# Supplementary material
Source: MDPI journal article supplement (https://www.mdpi.com/2076-3417/12/1/515)
Supplement: s1 [file s1]

## Supplementary Information

### In Silico Studies of Tumor Targeted Peptide- Conjugated Natural Products for Targeting Over-Expressed Receptors in Breast Cancer Cells using Molecular Docking, Molecular Dynamics and MMGBSA Calculations

Lucy R. Hart, Charlotta G. Lebedenko, Saige M. Mitchell,  
Rachel E. Daso and Ipsita A. Banerjee\*

*Department of Chemistry, Fordham University 441 E. Fordham Road, Bronx, NY 10458*

\* Corresponding Author: Ipsita A. Banerjee

Email: [banerjee@fordham.edu](mailto:banerjee@fordham.edu)

Fax: (718)-817-4432

**Table S1.** Binding Energies based on FireDock Analysis of each of the ligands with ER $\alpha$ , PPAR $\alpha$  and EGFR

#### (a) ER $\alpha$

|                             | Polyphenol    | Polyphenol       | Polyphenol  | Polyphenol      |                             |
|-----------------------------|---------------|------------------|-------------|-----------------|-----------------------------|
| Peptide Sequence Conjugated | Carnosic Acid | Chlorogenic Acid | Gallic Acid | Rosmarinic Acid | Neat Peptide (unconjugated) |
| YHWYGYTPQN (original)       | -64.23        | -66.23           | -73.15      | -73.36          | -61.63                      |
| FHWYGYTPQN (Mut1)           | -57.61        | -67.98           | -73.56      | -62.90          | -68.13                      |
| YIWYGYTPQN (Mut2)           | -79.12        | -73.56           | -70.11      | -66.24          | -64.23                      |
| YHWYGYTHQN (Mut3)           | -63.70        | -78.09           | -64.63      | -69.61          | -70.49                      |
| YHWYGYTPQD (Mut4)           | -68.57        | -70.26           | -80.98      | -42.37          | -70.45                      |

#### (b) PPAR $\alpha$

|                             | Polyphenol    | Polyphenol       | Polyphenol  | Polyphenol      |                             |
|-----------------------------|---------------|------------------|-------------|-----------------|-----------------------------|
| Peptide Sequence Conjugated | Carnosic Acid | Chlorogenic Acid | Gallic Acid | Rosmarinic Acid | Neat Peptide (unconjugated) |
| YHWYGYTPQN (original)       | -56.18        | -61.56           | -59.00      | -57.70          | -49.68                      |
| FHWYGYTPQN (Mut1)           | -67.12        | -55.23           | -62.95      | -57.97          | -49.55                      |
| YIWYGYTPQN (Mut2)           | -48.47        | -55.14           | -59.82      | -52.45          | -63.27                      |
| YHWYGYTHQN (Mut3)           | -65.81        | -57.02           | -58.52      | -60.65          | -52.99                      |
| YHWYGYTPQD (Mut4)           | -59.40        | -62.66           | -61.28      | -54.42          | -54.18                      |

#### (c) EGFR

|                             | Polyphenol    | Polyphenol       | Polyphenol  | Polyphenol      |                             |
|-----------------------------|---------------|------------------|-------------|-----------------|-----------------------------|
| Peptide Sequence Conjugated | Carnosic Acid | Chlorogenic Acid | Gallic Acid | Rosmarinic Acid | Neat Peptide (unconjugated) |
| YHWYGYTPQN (original)       | -59.96        | -63.18           | -57.78      | -52.97          | -60.12                      |
| FHWYGYTPQN (Mut1)           | -64.38        | -63.59           | -61.86      | -62.51          | -61.48                      |
| YIWYGYTPQN (Mut2)           | -62.73        | -60.99           | -67.08      | -56.35          | -60.53                      |
| YHWYGYTHQN (Mut3)           | -69.03        | -65.33           | -65.84      | -66.65          | -55.70                      |

|                   |        |        |        |        |        |
|-------------------|--------|--------|--------|--------|--------|
| YHWYGYTPQD (Mut4) | -61.12 | -57.41 | -60.71 | -72.15 | -55.23 |
|-------------------|--------|--------|--------|--------|--------|

**Table S2. Peptide Interactions with ER $\alpha$  Using PLIP**

**a. Neat Peptide (Y-H-W-Y-G-Y-T-P-Q-N)**

| Hydrogen Bonding |               | Hydrophobic Interactions |               | Stacking Interactions |               | Salt Bridges |               |
|------------------|---------------|--------------------------|---------------|-----------------------|---------------|--------------|---------------|
| Residue          | Distance (Å°) | Residue                  | Distance (Å°) | Residue               | Distance (Å°) | Residue      | Distance (Å°) |
| HIS377B          | 2.79          | GLU432D                  | 3.92          | TYR537A               | 4.97          | HIS516D      | 5.34          |
| GLU380B          | 2.76          | THR460B                  | 3.78          |                       |               | LYS520D      | 3.59          |
| GLU380B          | 2.14          | SER463B                  | 3.77          |                       |               |              |               |
| ASP426D          | 2.95          | MET522B                  | 3.81          |                       |               |              |               |
| LEU462B          | 2.15          | TYR537B                  | 3.68          |                       |               |              |               |
| SER463B          | 3.05          | TYR537B                  | 3.62          |                       |               |              |               |
| SER464B          | 2.63          | TYR537B                  | 3.49          |                       |               |              |               |
| HIS516D          | 3.6           | ASP538A                  | 3.76          |                       |               |              |               |
| HIS516D          | 2.14          |                          |               |                       |               |              |               |
| SER518B          | 3.07          |                          |               |                       |               |              |               |
| SER518B          | 2.76          |                          |               |                       |               |              |               |
| ASN519B          | 2.9           |                          |               |                       |               |              |               |
| LYS520D          | 3.06          |                          |               |                       |               |              |               |
| TYR526B          | 2.33          |                          |               |                       |               |              |               |
| VAL534A          | 1.92          |                          |               |                       |               |              |               |
| SER536A          | 2.26          |                          |               |                       |               |              |               |
| ASP538A          | 2.65          |                          |               |                       |               |              |               |
| ASP538A          | 2.28          |                          |               |                       |               |              |               |

**S2b. Mutation 1 (E-H-W-Y-G-Y-T-P-Q-N)**

| Hydrogen Bonding |               | Hydrophobic Interactions |               | Stacking Interactions |               | Cation Interactions |               | Salt Bridges |               |
|------------------|---------------|--------------------------|---------------|-----------------------|---------------|---------------------|---------------|--------------|---------------|
| Residue          | Distance (Å°) | Residue                  | Distance (Å°) | Residue               | Distance (Å°) | Residue             | Distance (Å°) | Residue      | Distance (Å°) |
| HIS377B          | 2.59          | HIS377B                  | 3.5           | -                     | -             | -                   | -             | -            | -             |
| ARG412D          | 2.39          | VAL422D                  | 3.75          |                       |               |                     |               |              |               |
| GLY420D          | 2.77          | GLU432D                  | 3.83          |                       |               |                     |               |              |               |
| GLU423D          | 2.7           | TYR526A                  | 3.74          |                       |               |                     |               |              |               |
| THR460B          | 2             | TYR526A                  | 3.46          |                       |               |                     |               |              |               |
| SER464B          | 2.95          | LYS531A                  | 3.72          |                       |               |                     |               |              |               |
| ASN532A          | 2.46          | VAL534A                  | 3.97          |                       |               |                     |               |              |               |
| PRO535A          | 2.13          | TYR537A                  | 3.7           |                       |               |                     |               |              |               |
| SER536A          | 2.17          | TYR537B                  | 3.61          |                       |               |                     |               |              |               |
| SER536A          | 1.84          | TYR537B                  | 3.63          |                       |               |                     |               |              |               |
| SER536A          | 2.48          | ASP538A                  | 3.75          |                       |               |                     |               |              |               |
| SER536A          | 3.46          |                          |               |                       |               |                     |               |              |               |
| ASP538A          | 2.06          |                          |               |                       |               |                     |               |              |               |
| ASP538A          | 3.23          |                          |               |                       |               |                     |               |              |               |
| GLU542A          | 2.53          |                          |               |                       |               |                     |               |              |               |

**S2c. Mutation 2 (Y-I-W-Y-G-Y-T-P-Q-N) with ER $\alpha$**

| Hydrogen Bonding |               | Hydrophobic Interactions |               | Stacking Interactions |               | Cation Interactions |               | Salt Bridges |               |
|------------------|---------------|--------------------------|---------------|-----------------------|---------------|---------------------|---------------|--------------|---------------|
| Residue          | Distance (Å°) | Residue                  | Distance (Å°) | Residue               | Distance (Å°) | Residue             | Distance (Å°) | Residue      | Distance (Å°) |
| HIS373A          | 2.91          | GLU423D                  | 3.61          | TYR526A               | 4.95          | -                   | -             | -            | -             |
| HIS373B          | 3.01          | THR460B                  | 3.52          | TYR537A               | 4.22          |                     |               |              |               |
| HIS377A          | 3.24          | VAL534A                  | 3.54          |                       |               |                     |               |              |               |
| GLU380B          | 2.77          | TYR537A                  | 3.99          |                       |               |                     |               |              |               |
| GLU380B          | 2.15          | TYR537B                  | 3.45          |                       |               |                     |               |              |               |
| GLU380B          | 1.83          |                          |               |                       |               |                     |               |              |               |
| TRP383B          | 2.69          |                          |               |                       |               |                     |               |              |               |
| ARG412D          | 2.5           |                          |               |                       |               |                     |               |              |               |
| GLU423D          | 2.19          |                          |               |                       |               |                     |               |              |               |
| ASP426D          | 2.03          |                          |               |                       |               |                     |               |              |               |
| VAL533A          | 3.14          |                          |               |                       |               |                     |               |              |               |
| TYR537A          | 2.26          |                          |               |                       |               |                     |               |              |               |
| TYR537B          | 2.37          |                          |               |                       |               |                     |               |              |               |
| ASP538B          | 2.65          |                          |               |                       |               |                     |               |              |               |

**S2d. Mutation 3 (Y-H-W-Y-G-Y-T-H-Q-N) with ER $\alpha$**

| Hydrogen Bonding |               | Hydrophobic Interactions |               | Stacking Interactions |               | Cation Interactions |               | Salt Bridges |               |
|------------------|---------------|--------------------------|---------------|-----------------------|---------------|---------------------|---------------|--------------|---------------|
| Residue          | Distance (Å°) | Residue                  | Distance (Å°) | Residue               | Distance (Å°) | Residue             | Distance (Å°) | Residue      | Distance (Å°) |
| THR371B          | 3.26          | VAL422D                  | 3.68          | TYR537A               | 5.06          | ARG412D             | 5.36          | -            | -             |
| ARG412D          | 2.83          | GLU423D                  | 3.64          |                       |               |                     |               |              |               |
| GLU419D          | 2.6           | ASP426D                  | 3.77          |                       |               |                     |               |              |               |
| ASP426D          | 2.29          | LEU462B                  | 3.68          |                       |               |                     |               |              |               |
| LEU462B          | 2.6           | SER463B                  | 3.72          |                       |               |                     |               |              |               |
| MET528A          | 2.26          | TYR526A                  | 3.39          |                       |               |                     |               |              |               |
| LYS531A          | 2.76          | TYR537A                  | 3.83          |                       |               |                     |               |              |               |
| VAL533A          | 2.54          | TYR537B                  | 3.66          |                       |               |                     |               |              |               |
| VAL534A          | 2.74          | TYR537B                  | 3.84          |                       |               |                     |               |              |               |
| SER536A          | 2.26          | TYR537B                  | 3.63          |                       |               |                     |               |              |               |
| TYR537A          | 2.63          | LEU 514A                 | 3.84          |                       |               |                     |               |              |               |
| ASP538A          | 2.55          |                          |               |                       |               |                     |               |              |               |
| ASP538A          | 3.01          |                          |               |                       |               |                     |               |              |               |
| ASP538A          | 2.15          |                          |               |                       |               |                     |               |              |               |
| ASP538B          | 3.73          |                          |               |                       |               |                     |               |              |               |
| LEU539A          | 3.6           |                          |               |                       |               |                     |               |              |               |
| GLU542A          | 2.66          |                          |               |                       |               |                     |               |              |               |
| GLU542A          | 2.65          |                          |               |                       |               |                     |               |              |               |

### S2e. Mutation 4 (Y-H-W-Y-G-Y-T-P-Q-D) with ER

[illegible]

**Table S3. Polyphenol-Peptide (Y-H-W-Y-G-Y-T-P-Q-N) Conjugate Interactions with ER $\alpha$**   
**a. Chlorogenate-Pep**

| Hydrogen Bonding |               | Hydrophobic Interactions |               | Stacking Interactions |               | Cation Interactions |               | Salt Bridges |               |
|------------------|---------------|--------------------------|---------------|-----------------------|---------------|---------------------|---------------|--------------|---------------|
| Residue          | Distance (Å°) | Residue                  | Distance (Å°) | Residue               | Distance (Å°) | Residue             | Distance (Å°) | Residue      | Distance (Å°) |
| HIS373A          | 2.23          | GLU380B                  | 3.65          | TYR526A               | 4.85          | ARG412D             | 4.47          | HIS516D      | 5.23          |
| HIS377B          | 2.18          | VAL422D                  | 3.9           | TYR537A               | 4.2           |                     |               |              |               |
| GLU380A          | 2.4           | GLU423D                  | 3.96          |                       |               |                     |               |              |               |
| GLU380A          | 2.83          | LEU462B                  | 3.75          |                       |               |                     |               |              |               |
| GLU380B          | 2.56          | SER463B                  | 3.41          |                       |               |                     |               |              |               |
| ARG412D          | 2.99          | LYS531A                  | 3.55          |                       |               |                     |               |              |               |
| GLU423D          | 2.86          | VAL534A                  | 3.91          |                       |               |                     |               |              |               |
| ASP426D          | 3.09          | VAL534A                  | 3.53          |                       |               |                     |               |              |               |
| ASN519B          | 2.23          | TYR537A                  | 3.84          |                       |               |                     |               |              |               |
| LYS520D          | 2.1           | TYR537B                  | 3.34          |                       |               |                     |               |              |               |
| TYR526A          | 2.45          |                          |               |                       |               |                     |               |              |               |
| TYR526B          | 2.86          |                          |               |                       |               |                     |               |              |               |
| TYR526B          | 2.88          |                          |               |                       |               |                     |               |              |               |
| TYR526B          | 3.05          |                          |               |                       |               |                     |               |              |               |
| MET528A          | 3.11          |                          |               |                       |               |                     |               |              |               |
| VAL533A          | 2.72          |                          |               |                       |               |                     |               |              |               |
| VAL534A          | 3.11          |                          |               |                       |               |                     |               |              |               |
| SER536A          | 3.23          |                          |               |                       |               |                     |               |              |               |
| TYR537A          | 2.31          |                          |               |                       |               |                     |               |              |               |
| ASP538A          | 3.66          |                          |               |                       |               |                     |               |              |               |

**S3b. Carnosate-Pep**

| Hydrogen Bonding |               | Hydrophobic Interactions |               | Stacking Interactions |               | Cation Interactions |               | Salt Bridges |               |
|------------------|---------------|--------------------------|---------------|-----------------------|---------------|---------------------|---------------|--------------|---------------|
| Residue          | Distance (Å°) | Residue                  | Distance (Å°) | Residue               | Distance (Å°) | Residue             | Distance (Å°) | Residue      | Distance (Å°) |
| HIS377B          | 3.45          | ASP426D                  | 3.53          | TYR526A               | 4.58          | -                   | -             | -            | -             |
| ARG412D          | 2.03          | SER463B                  | 3.12          | TYR526A               | 5.15          |                     |               |              |               |
| ARG412D          | 2.25          | TYR526A                  | 3.88          | TYR526A               | 3.94          |                     |               |              |               |
| GLU423D          | 2.85          | ASN532A                  | 3.71          |                       |               |                     |               |              |               |
| THR460B          | 2.76          | VAL534A                  | 3.79          |                       |               |                     |               |              |               |
| LEU462B          | 3.22          | VAL534A                  | 3.59          |                       |               |                     |               |              |               |
| LEU462B          | 2.4           | TYR537A                  | 3.69          |                       |               |                     |               |              |               |
| ASN532A          | 2.75          | TYR537B                  | 3.63          |                       |               |                     |               |              |               |
| VAL533A          | 2.67          | TYR537B                  | 3.4           |                       |               |                     |               |              |               |
| VAL534A          | 3.02          |                          |               |                       |               |                     |               |              |               |
| SER536A          | 2.44          |                          |               |                       |               |                     |               |              |               |
| 5SER36A          | 3.11          |                          |               |                       |               |                     |               |              |               |

### S3c. Gallate-Pep

| Hydrogen Bonding |               | Hydrophobic Interactions |               | Stacking Interactions |               | Cation Interactions |               | Salt Bridges |               |
|------------------|---------------|--------------------------|---------------|-----------------------|---------------|---------------------|---------------|--------------|---------------|
| Residue          | Distance (Å°) | Residue                  | Distance (Å°) | Residue               | Distance (Å°) | Residue             | Distance (Å°) | Residue      | Distance (Å°) |
| HIS377B          | 2.81          | THR465B                  | 3.44          | -                     | -             | ARG412D             | 4.94          | -            | -             |
| ARG412D          | 3.44          | TYR537A                  | 3.95          |                       |               |                     |               |              |               |
| ARG412D          | 2.13          | LEU539A                  | 3.69          |                       |               |                     |               |              |               |
| ARG412D          | 3.29          | LEU539A                  | 3.5           |                       |               |                     |               |              |               |
| GLU423D          | 2.22          | LEU539A                  | 3.84          |                       |               |                     |               |              |               |
| GLU423D          | 2.5           | LEU541A                  | 3.6           |                       |               |                     |               |              |               |
| PHE461B          | 3.28          | GLU542A                  | 3.73          |                       |               |                     |               |              |               |
| LEU462B          | 3.39          |                          |               |                       |               |                     |               |              |               |
| SER464B          | 3.35          |                          |               |                       |               |                     |               |              |               |
| SER464B          | 3.21          |                          |               |                       |               |                     |               |              |               |
| TYR526B          | 2.98          |                          |               |                       |               |                     |               |              |               |
| ASN532A          | 2.49          |                          |               |                       |               |                     |               |              |               |
| SER536A          | 2.1           |                          |               |                       |               |                     |               |              |               |
| SER536A          | 2.94          |                          |               |                       |               |                     |               |              |               |
| ASP538A          | 3.14          |                          |               |                       |               |                     |               |              |               |
| ASP538A          | 2.94          |                          |               |                       |               |                     |               |              |               |

### S3d. Rosmarinate-Pep

| Hydrogen Bonding |               | Hydrophobic Interactions |               | Stacking Interactions |               | Cation Interactions |               | Salt Bridges |               |
|------------------|---------------|--------------------------|---------------|-----------------------|---------------|---------------------|---------------|--------------|---------------|
| Residue          | Distance (Å°) | Residue                  | Distance (Å°) | Residue               | Distance (Å°) | Residue             | Distance (Å°) | Residue      | Distance (Å°) |
| GLU380A          | 2.19          | VAL422D                  | 3.87          | TYR526A               | 4.91          | -                   | -             | HIS377B      | 5.24          |
| GLU380B          | 3.05          | VAL422D                  | 3.47          | TYR537A               | 4.29          |                     |               | LYS520D      | 3.45          |
| CYS381B          | 2.17          | GLU423D                  | 3.36          |                       |               |                     |               |              |               |
| TRP383B          | 1.94          | THR460B                  | 3.75          |                       |               |                     |               |              |               |
| ARG412D          | 2.53          | LEU462B                  | 3.44          |                       |               |                     |               |              |               |
| MET427D          | 3.54          | TYR526A                  | 3.63          |                       |               |                     |               |              |               |
| THR460B          | 3.39          | TYR526A                  | 3.67          |                       |               |                     |               |              |               |
| HIS516D          | 2.34          | TYR537A                  | 3.43          |                       |               |                     |               |              |               |
| ASN519B          | 3.3           | TYR537B                  | 3.44          |                       |               |                     |               |              |               |
| LYS520D          | 3.31          | TYR537B                  | 3.68          |                       |               |                     |               |              |               |
| TYR526B          | 1.99          |                          |               |                       |               |                     |               |              |               |
| ASN532A          | 2.86          |                          |               |                       |               |                     |               |              |               |
| VAL534A          | 2.16          |                          |               |                       |               |                     |               |              |               |
| VAL534A          | 2.25          |                          |               |                       |               |                     |               |              |               |
| SER536A          | 2.27          |                          |               |                       |               |                     |               |              |               |
| TYR537A          | 1.99          |                          |               |                       |               |                     |               |              |               |
| TYR537B          | 3.08          |                          |               |                       |               |                     |               |              |               |
| ASP538A          | 3.12          |                          |               |                       |               |                     |               |              |               |

**Table S3e. Chlorogenate-Mut1 (F-H-W-Y-G-Y-T-P-Q-N) conjugate with ER $\alpha$**

| Hydrogen Bonding |               | Hydrophobic Interactions |               | Stacking Interactions |               | Cation Interactions |               | Salt Bridges |               |
|------------------|---------------|--------------------------|---------------|-----------------------|---------------|---------------------|---------------|--------------|---------------|
| Residue          | Distance (Å°) | Residue                  | Distance (Å°) | Residue               | Distance (Å°) | Residue             | Distance (Å°) | Residue      | Distance (Å°) |
| THR371B          | 3.01          | GLU423D                  | 3.6           | TYR526A               | 4.87          | HIS373B             | 4.65          | -            | -             |
| HIS373B          | 3.09          | ASP426D                  | 3.82          | TYR537B               | 4.29          |                     |               |              |               |
| ASP374B          | 2.22          | TYR526A                  | 3.88          |                       |               |                     |               |              |               |
| GLU380A          | 2.48          | VAL534A                  | 3.56          |                       |               |                     |               |              |               |
| GLU380B          | 2.67          | TYR537A                  | 3.65          |                       |               |                     |               |              |               |
| TRP383A          | 2.2           | TYR537B                  | 3.37          |                       |               |                     |               |              |               |
| ARG412D          | 2.84          | ASP538A                  | 3.73          |                       |               |                     |               |              |               |
| ASP426D          | 2.02          | GLU542A                  | 3.74          |                       |               |                     |               |              |               |
| LEU462B          | 2.79          |                          |               |                       |               |                     |               |              |               |
| SER468B          | 2.53          |                          |               |                       |               |                     |               |              |               |
| TYR526A          | 2.44          |                          |               |                       |               |                     |               |              |               |
| TYR526A          | 2.41          |                          |               |                       |               |                     |               |              |               |
| ASN532A          | 3.45          |                          |               |                       |               |                     |               |              |               |
| VAL534A          | 2.53          |                          |               |                       |               |                     |               |              |               |
| VAL534A          | 2.53          |                          |               |                       |               |                     |               |              |               |
| SER536A          | 2.95          |                          |               |                       |               |                     |               |              |               |
| SER536A          | 2.75          |                          |               |                       |               |                     |               |              |               |
| TYR537A          | 2.38          |                          |               |                       |               |                     |               |              |               |
| ASP538A          | 2.24          |                          |               |                       |               |                     |               |              |               |
| ASP538A          | 3.02          |                          |               |                       |               |                     |               |              |               |

**S3f. Carnosate--Mut1 (F-H-W-Y-G-Y-T-P-Q-N) conjugate with ER $\alpha$**

| Hydrogen Bonding |               | Hydrophobic Interactions |               | Stacking Interactions |               | Cation Interactions |               | Salt Bridges |               |
|------------------|---------------|--------------------------|---------------|-----------------------|---------------|---------------------|---------------|--------------|---------------|
| Residue          | Distance (Å°) | Residue                  | Distance (Å°) | Residue               | Distance (Å°) | Residue             | Distance (Å°) | Residue      | Distance (Å°) |
| HIS377A          | 2.34          | VAL422C                  | 3.84          | TYR526A               | 4.69          | -                   | -             | HIS377A      | 5.34          |
| HIS377B          | 3.21          | TYR526A                  | 3.9           |                       |               |                     |               |              |               |
| ARG412C          | 2.78          | TYR526B                  | 3.57          |                       |               |                     |               |              |               |
| ARG412D          | 2.94          | LYS531B                  | 3.61          |                       |               |                     |               |              |               |
| GLU423C          | 2.23          | TYR537B                  | 3.99          |                       |               |                     |               |              |               |
| GLU423C          | 3.57          | ASP538A                  | 4             |                       |               |                     |               |              |               |
| LEU462A          | 2.46          |                          |               |                       |               |                     |               |              |               |
| ASN519A          | 2.61          |                          |               |                       |               |                     |               |              |               |
| TYR526A          | 2.55          |                          |               |                       |               |                     |               |              |               |
| SER536A          | 3.25          |                          |               |                       |               |                     |               |              |               |
| SER536B          | 3.25          |                          |               |                       |               |                     |               |              |               |
| SER536B          | 3.42          |                          |               |                       |               |                     |               |              |               |
| ASP538B          | 3.43          |                          |               |                       |               |                     |               |              |               |

**S3g. Gallate-Mut1 (F-H-W-Y-G-Y-T-P-Q-N) conjugate with ER $\alpha$**

| Hydrogen Bonding |               | Hydrophobic Interactions |               | Stacking Interactions |               | Cation Interactions |               | Salt Bridges |               |
|------------------|---------------|--------------------------|---------------|-----------------------|---------------|---------------------|---------------|--------------|---------------|
| Residue          | Distance (Å°) | Residue                  | Distance (Å°) | Residue               | Distance (Å°) | Residue             | Distance (Å°) | Residue      | Distance (Å°) |
| HIS373A          | 2.09          | GLU423C                  | 3.62          | TYR526B               | 4.86          | -                   | -             | HIS516C      | 4.82          |
| GLU380A          | 2.59          | GLU423C                  | 3.83          |                       |               |                     |               | LYS520C      | 3.49          |
| TRP383A          | 2.28          | THR460A                  | 3.7           |                       |               |                     |               |              |               |
| ARG412C          | 3.26          | MET522A                  | 3.42          |                       |               |                     |               |              |               |
| GLU419C          | 2.36          | TYR526A                  | 3.64          |                       |               |                     |               |              |               |
| HIS516C          | 2.01          | TYR526B                  | 3.83          |                       |               |                     |               |              |               |
| SER518A          | 2.9           | VAL534B                  | 3.83          |                       |               |                     |               |              |               |
| ASN519A          | 2.48          | VAL534B                  | 3.62          |                       |               |                     |               |              |               |
| LYS520C          | 3.26          | TYR537B                  | 3.77          |                       |               |                     |               |              |               |
| LEU525B          | 2.92          |                          |               |                       |               |                     |               |              |               |
| TYR526A          | 2.58          |                          |               |                       |               |                     |               |              |               |
| TYR526A          | 2.55          |                          |               |                       |               |                     |               |              |               |
| ASP538B          | 2.33          |                          |               |                       |               |                     |               |              |               |

**S3h. Rosmarinate- Mut1 (F-H-W-Y-G-Y-T-P-Q-N) conjugate with ER $\alpha$**

| Hydrogen Bonding |               | Hydrophobic Interactions |               | Stacking Interactions |               | Cation Interactions |               | Salt Bridges |               |
|------------------|---------------|--------------------------|---------------|-----------------------|---------------|---------------------|---------------|--------------|---------------|
| Residue          | Distance (Å°) | Residue                  | Distance (Å°) | Residue               | Distance (Å°) | Residue             | Distance (Å°) | Residue      | Distance (Å°) |
| HIS373B          | 2.63          | ASP426D                  | 3.67          | TYR526A               | 4.8           | -                   | -             | -            | -             |
| HIS377B          | 3.16          | THR460B                  | 3.83          |                       |               |                     |               |              |               |
| GLU380A          | 2.51          | TYR526A                  | 3.81          |                       |               |                     |               |              |               |
| GLU380B          | 1.87          | TYR526A                  | 3.61          |                       |               |                     |               |              |               |
| TRP383B          | 2.72          | LYS531A                  | 3.52          |                       |               |                     |               |              |               |
| GLU423D          | 2.93          | VAL534A                  | 3.55          |                       |               |                     |               |              |               |
| GLU423D          | 2.47          | VAL534A                  | 3.37          |                       |               |                     |               |              |               |
| GLU423D          | 2.62          | VAL534B                  | 3.75          |                       |               |                     |               |              |               |
| ASN519B          | 3.2           | TYR537A                  | 3.4           |                       |               |                     |               |              |               |
| LYS520D          | 2.15          | TYR537A                  | 3.83          |                       |               |                     |               |              |               |
| LEU525A          | 2.52          | TYR537B                  | 3.64          |                       |               |                     |               |              |               |
| TYR526B          | 2.28          |                          |               |                       |               |                     |               |              |               |
| TYR526B          | 2.29          |                          |               |                       |               |                     |               |              |               |
| MET528A          | 3.25          |                          |               |                       |               |                     |               |              |               |
| TYR537A          | 2.19          |                          |               |                       |               |                     |               |              |               |
| TYR537B          | 3.19          |                          |               |                       |               |                     |               |              |               |
| ASP538A          | 2.71          |                          |               |                       |               |                     |               |              |               |
| ASP538A          | 2.92          |                          |               |                       |               |                     |               |              |               |
| ASP538A          | 2.77          |                          |               |                       |               |                     |               |              |               |
| ASP538B          | 2.92          |                          |               |                       |               |                     |               |              |               |



**Table S3i. Chlorogenate-Mut 2 (Y-I-W-Y-G-Y-T-P-Q-N) Conjugate with ER $\alpha$**

| Hydrogen Bonding |               | Hydrophobic Interactions |               | Stacking Interactions |               | Cation Interactions |               | Salt Bridges |               |
|------------------|---------------|--------------------------|---------------|-----------------------|---------------|---------------------|---------------|--------------|---------------|
| Residue          | Distance (Å°) | Residue                  | Distance (Å°) | Residue               | Distance (Å°) | Residue             | Distance (Å°) | Residue      | Distance (Å°) |
| HIS373B          | 2.17          | GLU380B                  | 3.66          | TYR526B               | 3.87          | LYS520C             | 3.51          | LYS520C      | 5.49          |
| HIS377A          | 3.04          | ASP426C                  | 3.65          |                       |               |                     |               |              |               |
| GLU380A          | 3.11          | ASN519A                  | 3.88          |                       |               |                     |               |              |               |
| GLU423C          | 1.97          | LYS520C                  | 3.88          |                       |               |                     |               |              |               |
| ASP426C          | 3.31          | TYR526A                  | 3.78          |                       |               |                     |               |              |               |
| THR460A          | 2.42          | TYR526B                  | 3.78          |                       |               |                     |               |              |               |
| THR460A          | 2.73          | VAL534A                  | 3.75          |                       |               |                     |               |              |               |
| THR460A          | 3.52          | TYR537A                  | 3.86          |                       |               |                     |               |              |               |
| PHE461B          | 2.7           | TYR537A                  | 4             |                       |               |                     |               |              |               |
| HIS516C          | 3.43          | TYR537B                  | 3.45          |                       |               |                     |               |              |               |
| ASN519A          | 2.13          | TYR537B                  | 3.3           |                       |               |                     |               |              |               |
| LYS520D          | 2.4           |                          |               |                       |               |                     |               |              |               |
| TYR526B          | 3.48          |                          |               |                       |               |                     |               |              |               |
| TYR526B          | 3.19          |                          |               |                       |               |                     |               |              |               |
| SER536A          | 2.99          |                          |               |                       |               |                     |               |              |               |
| ASP538A          | 2.08          |                          |               |                       |               |                     |               |              |               |
| ASP538A          | 2.17          |                          |               |                       |               |                     |               |              |               |

**S3j. Carnosate-Mut 2 (Y-I-W-Y-G-Y-T-P-Q-N) Conjugate with ER $\alpha$**

| Hydrogen Bonding |               | Hydrophobic Interactions |               | Stacking Interactions |               | Cation Interactions |               | Salt Bridges |               |
|------------------|---------------|--------------------------|---------------|-----------------------|---------------|---------------------|---------------|--------------|---------------|
| Residue          | Distance (Å°) | Residue                  | Distance (Å°) | Residue               | Distance (Å°) | Residue             | Distance (Å°) | Residue      | Distance (Å°) |
| HIS377A          | 2.96          | TYR526A                  | 3.74          | -                     | -             | -                   | -             | ARG412C      | 4.45          |
| GLU380B          | 3.23          | TYR526A                  | 3.92          |                       |               |                     |               |              |               |
| TRP383A          | 2.94          | VAL534A                  | 3.66          |                       |               |                     |               |              |               |
| ARG412C          | 3.44          | TYR537A                  | 3.67          |                       |               |                     |               |              |               |
| GLU423C          | 2.32          | TYR537B                  | 3.5           |                       |               |                     |               |              |               |
| GLU423C          | 3.69          | TYR537B                  | 3.27          |                       |               |                     |               |              |               |
| GLU423C          | 3.52          |                          |               |                       |               |                     |               |              |               |
| THR460A          | 2.15          |                          |               |                       |               |                     |               |              |               |
| THR460A          | 3.18          |                          |               |                       |               |                     |               |              |               |
| THR460A          | 2.83          |                          |               |                       |               |                     |               |              |               |
| LYS520C          | 2.65          |                          |               |                       |               |                     |               |              |               |
| LYS531B          | 3.41          |                          |               |                       |               |                     |               |              |               |
| LYS531B          | 2.15          |                          |               |                       |               |                     |               |              |               |
| SER536B          | 2.34          |                          |               |                       |               |                     |               |              |               |
| SER536B          | 2.18          |                          |               |                       |               |                     |               |              |               |
| LEU539B          | 3.56          |                          |               |                       |               |                     |               |              |               |

**S3k. Gallate-Mut2 (Y-I-W-Y-G-Y-T-P-Q-N) Conjugate with ER $\alpha$**

| Hydrogen Bonding |               | Hydrophobic Interactions |               | Stacking Interactions |               | Cation Interactions |               | Salt Bridges |               |
|------------------|---------------|--------------------------|---------------|-----------------------|---------------|---------------------|---------------|--------------|---------------|
| Residue          | Distance (Å°) | Residue                  | Distance (Å°) | Residue               | Distance (Å°) | Residue             | Distance (Å°) | Residue      | Distance (Å°) |
| HIS373B          | 3.32          | GLU380A                  | 3.95          | TYR537A               | 4.25          | -                   | -             | -            | -             |
| HIS377B          | 2.6           | VAL422D                  | 3.25          |                       |               |                     |               |              |               |
| GLU380A          | 2.02          | GLU423D                  | 3.65          |                       |               |                     |               |              |               |
| ARG412D          | 2.03          | TYR526A                  | 3.62          |                       |               |                     |               |              |               |
| ARG412D          | 1.92          | TYR526A                  | 3.68          |                       |               |                     |               |              |               |
| ARG412D          | 2.19          | LYS531A                  | 3.83          |                       |               |                     |               |              |               |
| PHE461B          | 2.06          | ASN532A                  | 3.52          |                       |               |                     |               |              |               |
| SER464B          | 2.84          | VAL534A                  | 3.84          |                       |               |                     |               |              |               |
| HIS516C          | 2.1           | TYR537A                  | 3.38          |                       |               |                     |               |              |               |
| LYS520C          | 2.52          | TYR537A                  | 3.88          |                       |               |                     |               |              |               |
| TYR526A          | 2.78          | LEU539A                  | 3.62          |                       |               |                     |               |              |               |
| MET528A          | 3.13          |                          |               |                       |               |                     |               |              |               |
| MET528A          | 2.17          |                          |               |                       |               |                     |               |              |               |
| SER536A          | 2.69          |                          |               |                       |               |                     |               |              |               |
| SER536A          | 3.46          |                          |               |                       |               |                     |               |              |               |
| TYR537A          | 2.03          |                          |               |                       |               |                     |               |              |               |
| ASP538A          | 2.45          |                          |               |                       |               |                     |               |              |               |
| ASP538A          | 2.78          |                          |               |                       |               |                     |               |              |               |
| ASP538A          | 2.52          |                          |               |                       |               |                     |               |              |               |

**S3l. Rosmarinate-Mut2 (Y-I-W-Y-G-Y-T-P-Q-N) Conjugate with ER $\alpha$**

| Hydrogen Bonding |               | Hydrophobic Interactions |               | Stacking Interactions |               | Cation Interactions |               | Salt Bridges |               |
|------------------|---------------|--------------------------|---------------|-----------------------|---------------|---------------------|---------------|--------------|---------------|
| Residue          | Distance (Å°) | Residue                  | Distance (Å°) | Residue               | Distance (Å°) | Residue             | Distance (Å°) | Residue      | Distance (Å°) |
| CYS381B          | 3.25          | ASP426D                  | 3.43          | -                     | -             | -                   | -             | HIS377A      | 4.89          |
| GLU423D          | 2.43          | THR460B                  | 3.99          |                       |               |                     |               |              |               |
| GLU423D          | 2.01          | TYR526B                  | 3.97          |                       |               |                     |               |              |               |
| TYR459B          | 3.19          | TYR537B                  | 3.67          |                       |               |                     |               |              |               |
| PHE461B          | 3.3           | ASP538A                  | 3.92          |                       |               |                     |               |              |               |
| LEU462A          | 2.47          |                          |               |                       |               |                     |               |              |               |
| LEU462B          | 1.83          |                          |               |                       |               |                     |               |              |               |
| LEU462B          | 3.6           |                          |               |                       |               |                     |               |              |               |
| SER463B          | 3.06          |                          |               |                       |               |                     |               |              |               |
| HIS516D          | 3.52          |                          |               |                       |               |                     |               |              |               |
| LYS520D          | 2.1           |                          |               |                       |               |                     |               |              |               |
| TYR526B          | 2.38          |                          |               |                       |               |                     |               |              |               |
| TYR526B          | 2.31          |                          |               |                       |               |                     |               |              |               |
| TYR526B          | 2.31          |                          |               |                       |               |                     |               |              |               |
| SER536A          | 3.02          |                          |               |                       |               |                     |               |              |               |
| SER536B          | 2.39          |                          |               |                       |               |                     |               |              |               |
| TYR537B          | 3             |                          |               |                       |               |                     |               |              |               |
| ASP538A          | 3.51          |                          |               |                       |               |                     |               |              |               |
| ASP538B          | 2.01          |                          |               |                       |               |                     |               |              |               |

**Table S3m. Chlorogenate-Mut3 (Y-H-W-Y-G-Y-T-H-Q-N) Conjugates with ER $\alpha$**

| Hydrogen Bonding |               | Hydrophobic Interactions |               | Stacking Interactions |               | Cation Interactions |               | Salt Bridges |               |
|------------------|---------------|--------------------------|---------------|-----------------------|---------------|---------------------|---------------|--------------|---------------|
| Residue          | Distance (Å°) | Residue                  | Distance (Å°) | Residue               | Distance (Å°) | Residue             | Distance (Å°) | Residue      | Distance (Å°) |
| GLU380A          | 3.08          | VAL422D                  | 3.51          | TYR526A               | 4.7           | -                   | -             | HIS377B      | 4.93          |
| ARG412C          | 2.48          | VAL534A                  | 3.85          | TYR526B               | 4.99          |                     |               |              |               |
| ARG412D          | 2.07          | VAL534A                  | 3.36          |                       |               |                     |               |              |               |
| GLU423D          | 3.4           | VAL534B                  | 3.42          |                       |               |                     |               |              |               |
| ASP426C          | 2.79          | TYR537A                  | 3.68          |                       |               |                     |               |              |               |
| ASP426C          | 2.09          | TYR537B                  | 3.49          |                       |               |                     |               |              |               |
| ASP426D          | 3.08          |                          |               |                       |               |                     |               |              |               |
| THR460A          | 1.88          |                          |               |                       |               |                     |               |              |               |
| LEU462B          | 2.83          |                          |               |                       |               |                     |               |              |               |
| TYR526A          | 2.88          |                          |               |                       |               |                     |               |              |               |
| LYS531A          | 2.51          |                          |               |                       |               |                     |               |              |               |
| LYS531B          | 2.55          |                          |               |                       |               |                     |               |              |               |
| SER536A          | 3.05          |                          |               |                       |               |                     |               |              |               |
| SER536A          | 2.53          |                          |               |                       |               |                     |               |              |               |
| ASP538A          | 3.59          |                          |               |                       |               |                     |               |              |               |

**Table S3n. Carnosate-Mut3 (Y-H-W-Y-G-Y-T-H-Q-N) Conjugates with ER $\alpha$**

| Hydrogen Bonding |               | Hydrophobic Interactions |               | Stacking Interactions |               | Cation Interactions |               | Salt Bridges |               |
|------------------|---------------|--------------------------|---------------|-----------------------|---------------|---------------------|---------------|--------------|---------------|
| Residue          | Distance (Å°) | Residue                  | Distance (Å°) | Residue               | Distance (Å°) | Residue             | Distance (Å°) | Residue      | Distance (Å°) |
| GLU380A          | 2.77          | HIS377A                  | 3.63          | -                     | -             | -                   | -             | ARG412D      | 4.6           |
| ARG412D          | 3.06          | VAL422D                  | 3.56          |                       |               |                     |               |              |               |
| ARG412D          | 2.82          | GLU423C                  | 3.63          |                       |               |                     |               |              |               |
| GLU423D          | 2.49          | GLU423D                  | 3.42          |                       |               |                     |               |              |               |
| THR460B          | 2.08          | TYR526A                  | 3.96          |                       |               |                     |               |              |               |
| TYR526A          | 2.5           | TYR526A                  | 3.97          |                       |               |                     |               |              |               |
| ASN532A          | 3.69          | VAL534A                  | 3.33          |                       |               |                     |               |              |               |
| VAL534A          | 3.26          | VAL534A                  | 3.44          |                       |               |                     |               |              |               |
| SER536A          | 2.55          | TYR537A                  | 3.59          |                       |               |                     |               |              |               |
| SER536A          | 2.65          | TYR537A                  | 3.5           |                       |               |                     |               |              |               |
| TYR537B          | 3.13          | TYR537A                  | 3.69          |                       |               |                     |               |              |               |
| ASP538A          | 2.36          | TYR537B                  | 3.35          |                       |               |                     |               |              |               |
|                  |               | ASP538A                  | 3.92          |                       |               |                     |               |              |               |

**Table S3o. Gallate-Mut 3 (Y-H-W-Y-G-Y-T-H-Q-N) Conjugates with ER $\alpha$**

| Hydrogen Bonding |               | Hydrophobic Interactions |               | Stacking Interactions |               | Cation Interactions |               | Salt Bridges |               |
|------------------|---------------|--------------------------|---------------|-----------------------|---------------|---------------------|---------------|--------------|---------------|
| Residue          | Distance (Å°) | Residue                  | Distance (Å°) | Residue               | Distance (Å°) | Residue             | Distance (Å°) | Residue      | Distance (Å°) |
| HIS377A          | 2.42          | TYR537A                  | 3.36          | TYR537A               | 5.13          | -                   | -             | ARG412C      | 4.26          |
| GLU380A          | 2.42          | TYR537B                  | 3.68          |                       |               |                     |               |              |               |
| GLU380A          | 3.3           | TYR537B                  | 3.54          |                       |               |                     |               |              |               |
| GLU380B          | 2.67          | LEU539B                  | 3.65          |                       |               |                     |               |              |               |
| ARG412C          | 2.42          |                          |               |                       |               |                     |               |              |               |
| GLU423C          | 1.72          |                          |               |                       |               |                     |               |              |               |
| LEU462A          | 2.31          |                          |               |                       |               |                     |               |              |               |
| SER463A          | 3.53          |                          |               |                       |               |                     |               |              |               |
| VAL533B          | 2.86          |                          |               |                       |               |                     |               |              |               |
| SER536B          | 3.06          |                          |               |                       |               |                     |               |              |               |
| SER536B          | 2.55          |                          |               |                       |               |                     |               |              |               |
| TYR537A          | 2.5           |                          |               |                       |               |                     |               |              |               |
| TYR537B          | 2.55          |                          |               |                       |               |                     |               |              |               |
| ASP538A          | 2.73          |                          |               |                       |               |                     |               |              |               |
| ASP538B          | 3.09          |                          |               |                       |               |                     |               |              |               |
| ASP538B          | 2.8           |                          |               |                       |               |                     |               |              |               |

**Table S3p. Rosmarinate-Mut 3 (Y-H-W-Y-G-Y-T-H-Q-N) Conjugates with ER $\alpha$**

| Hydrogen Bonding |               | Hydrophobic Interactions |               | Stacking Interactions |               | Cation Interactions |               | Salt Bridges |               |
|------------------|---------------|--------------------------|---------------|-----------------------|---------------|---------------------|---------------|--------------|---------------|
| Residue          | Distance (Å°) | Residue                  | Distance (Å°) | Residue               | Distance (Å°) | Residue             | Distance (Å°) | Residue      | Distance (Å°) |
| HIS373A          | 2.31          | GLU380A                  | 3.57          | TYR526B               | 5.12          | -                   | -             | HIS377A      | 4.61          |
| HIS373B          | 2.33          | VAL534B                  | 3.81          | TYR537A               | 4.24          |                     |               |              |               |
| GLU380B          | 2.46          | TYR537A                  | 3.71          |                       |               |                     |               |              |               |
| GLU380B          | 3.03          | TYR537B                  | 3.56          |                       |               |                     |               |              |               |
| ARG412C          | 2.36          |                          |               |                       |               |                     |               |              |               |
| VAL422C          | 3.28          |                          |               |                       |               |                     |               |              |               |
| GLU423C          | 2.21          |                          |               |                       |               |                     |               |              |               |
| GLU423C          | 2.46          |                          |               |                       |               |                     |               |              |               |
| GLU423C          | 2.99          |                          |               |                       |               |                     |               |              |               |
| THR460B          | 2.23          |                          |               |                       |               |                     |               |              |               |
| HIS516C          | 2.47          |                          |               |                       |               |                     |               |              |               |
| HIS516D          | 2.26          |                          |               |                       |               |                     |               |              |               |
| LYS520C          | 2.94          |                          |               |                       |               |                     |               |              |               |
| TYR526A          | 2.94          |                          |               |                       |               |                     |               |              |               |
| TYR526A          | 3.23          |                          |               |                       |               |                     |               |              |               |
| TYR537B          | 2.69          |                          |               |                       |               |                     |               |              |               |
| ASP538A          | 1.89          |                          |               |                       |               |                     |               |              |               |
| ASP538A          | 3.05          |                          |               |                       |               |                     |               |              |               |
| ASP538B          | 3             |                          |               |                       |               |                     |               |              |               |

**Table S3q. Chlorogenate-Mut 4 (Y-H-W-Y-G-Y-T-P-Q-D) Conjugates with ER $\alpha$**

| Hydrogen Bonding |               | Hydrophobic Interactions |               | Stacking Interactions |               | Cation Interactions |               | Salt Bridges |               |
|------------------|---------------|--------------------------|---------------|-----------------------|---------------|---------------------|---------------|--------------|---------------|
| Residue          | Distance (Å°) | Residue                  | Distance (Å°) | Residue               | Distance (Å°) | Residue             | Distance (Å°) | Residue      | Distance (Å°) |
| THR371B          | 3             | VAL422C                  | 3.5           | -                     | -             | -                   | -             | HIS377A      | 4.19          |
| HIS373B          | 2.87          | GLU423D                  | 3.95          |                       |               |                     |               | HIS377A      | 5.09          |
| ASP374B          | 2.35          | GLU423D                  | 3.44          |                       |               |                     |               |              |               |
| ASP374B          | 2.88          | TYR526B                  | 3.81          |                       |               |                     |               |              |               |
| GLU380A          | 3.08          | TYR526B                  | 3.77          |                       |               |                     |               |              |               |
| GLU380A          | 2.01          | LYS531B                  | 3.88          |                       |               |                     |               |              |               |
| ARG412C          | 2.58          | VAL534B                  | 3.46          |                       |               |                     |               |              |               |
| ARG412D          | 2.8           | VAL534B                  | 3.49          |                       |               |                     |               |              |               |
| ARG412D          | 2.59          | TYR537B                  | 3.56          |                       |               |                     |               |              |               |
| GLU423D          | 2.82          | ASP538B                  | 3.96          |                       |               |                     |               |              |               |
| THR460A          | 2.2           | LEU541A                  | 4             |                       |               |                     |               |              |               |
| TYR526B          | 2.58          | GLU542A                  | 3.66          |                       |               |                     |               |              |               |
| LYS531B          | 3.09          |                          |               |                       |               |                     |               |              |               |
| SER536B          | 2.05          |                          |               |                       |               |                     |               |              |               |
| SER536B          | 2.14          |                          |               |                       |               |                     |               |              |               |
| TYR537B          | 2.43          |                          |               |                       |               |                     |               |              |               |
| ASP538A          | 2.63          |                          |               |                       |               |                     |               |              |               |
| ASP538B          | 2.16          |                          |               |                       |               |                     |               |              |               |

**Table S3r. Carnosate-Mut 4 (Y-H-W-Y-G-Y-T-P-Q-D) Conjugates with ER $\alpha$**

| Hydrogen Bonding |               | Hydrophobic Interactions |               | Stacking Interactions |               | Cation Interactions |               | Salt Bridges |               |
|------------------|---------------|--------------------------|---------------|-----------------------|---------------|---------------------|---------------|--------------|---------------|
| Residue          | Distance (Å°) | Residue                  | Distance (Å°) | Residue               | Distance (Å°) | Residue             | Distance (Å°) | Residue      | Distance (Å°) |
| ARG412D          | 3.35          | GLU423D                  | 3.15          | -                     | -             | ARG412D             | 4.74          | -            | -             |
| GLU423D          | 2.09          | ASP426D                  | 3.21          |                       |               |                     |               |              |               |
| GLU423D          | 2.67          | THR460B                  | 3.82          |                       |               |                     |               |              |               |
| GLU423D          | 2.36          | LEU462B                  | 3.96          |                       |               |                     |               |              |               |
| HIS516D          | 2.29          | TYR537A                  | 3.63          |                       |               |                     |               |              |               |
| LYS520D          | 2.24          | TYR537B                  | 3.4           |                       |               |                     |               |              |               |
| TYR526A          | 2.48          | TYR537B                  | 3.71          |                       |               |                     |               |              |               |
| TYR526B          | 2.47          | LEU539A                  | 3.54          |                       |               |                     |               |              |               |
| TYR526B          | 3.22          | LEU539A                  | 3.97          |                       |               |                     |               |              |               |
| SER536A          | 2.26          |                          |               |                       |               |                     |               |              |               |
| SER536A          | 3.53          |                          |               |                       |               |                     |               |              |               |
| TYR537A          | 2.47          |                          |               |                       |               |                     |               |              |               |
| TYR537B          | 2.93          |                          |               |                       |               |                     |               |              |               |
| ASP538A          | 3.65          |                          |               |                       |               |                     |               |              |               |

Table S3s. Gallate- Mut 4 (Y-H-W-Y-G-Y-T-P-Q-D) Conjugates with ER $\alpha$ 

| Hydrogen Bonding |               | Hydrophobic Interactions |               | Stacking Interactions |               | Cation Interactions |               | Salt Bridges |               |
|------------------|---------------|--------------------------|---------------|-----------------------|---------------|---------------------|---------------|--------------|---------------|
| Residue          | Distance (Å°) | Residue                  | Distance (Å°) | Residue               | Distance (Å°) | Residue             | Distance (Å°) | Residue      | Distance (Å°) |
| GLU380A          | 3.31          | GLU380A                  | 3.42          | TYR537B               | 4.12          | HIS516C             | 4.48          | -            | -             |
| GLU380B          | 3.54          | VAL422D                  | 3.57          |                       |               |                     |               |              |               |
| ARG412D          | 3.25          | GLU423C                  | 3.98          |                       |               |                     |               |              |               |
| ASP426C          | 3.01          | TYR526A                  | 3.94          |                       |               |                     |               |              |               |
| ASP426D          | 3.49          | TYR526A                  | 3.79          |                       |               |                     |               |              |               |
| MET427D          | 3.59          | VAL534A                  | 3.44          |                       |               |                     |               |              |               |
| THR460A          | 2.64          | VAL534A                  | 3.63          |                       |               |                     |               |              |               |
| THR460A          | 2.61          | TYR537A                  | 3.37          |                       |               |                     |               |              |               |
| LEU462B          | 2.55          | TYR537A                  | 3.73          |                       |               |                     |               |              |               |
| SER463B          | 2.95          | TYR537B                  | 3.53          |                       |               |                     |               |              |               |
| HIS516C          | 2.54          | TYR538A                  | 3.53          |                       |               |                     |               |              |               |
| LYS520C          | 2.6           |                          |               |                       |               |                     |               |              |               |
| TYR526A          | 2.04          |                          |               |                       |               |                     |               |              |               |
| LYS531A          | 2.5           |                          |               |                       |               |                     |               |              |               |
| LYS531A          | 2.11          |                          |               |                       |               |                     |               |              |               |
| SER536A          | 3.14          |                          |               |                       |               |                     |               |              |               |
| ASP538A          | 2.65          |                          |               |                       |               |                     |               |              |               |
| ASP538A          | 2.45          |                          |               |                       |               |                     |               |              |               |
| GLU542A          | 2.67          |                          |               |                       |               |                     |               |              |               |

Table S3t. Rosmarinate-Mut 4 (Y-H-W-Y-G-Y-T-P-Q-D) Conjugates with ER $\alpha$ 

| Hydrogen Bonding |               | Hydrophobic Interactions |               | Stacking Interactions |               | Cation Interactions |               | Salt Bridges |               |
|------------------|---------------|--------------------------|---------------|-----------------------|---------------|---------------------|---------------|--------------|---------------|
| Residue          | Distance (Å°) | Residue                  | Distance (Å°) | Residue               | Distance (Å°) | Residue             | Distance (Å°) | Residue      | Distance (Å°) |
| HIS377A          | 2.92          | GLU380B                  | 3.75          | HIS516D               | 4.6           | HIS377B             | 5.45          | ARG412D      | 4.86          |
| CYS381B          | 2.22          | GLU423D                  | 3.66          | TYR537A               | 4.22          |                     |               | LYS520D      | 3.84          |
| TRP383B          | 2.67          | THR460B                  | 3.77          |                       |               |                     |               |              |               |
| ARG412D          | 2.63          | SER463B                  | 3.36          |                       |               |                     |               |              |               |
| ARG412D          | 2.21          | TYR526B                  | 3.84          |                       |               |                     |               |              |               |
| ARG412D          | 2.26          | VAL534A                  | 3.6           |                       |               |                     |               |              |               |
| ASP426D          | 3             | TYR537A                  | 3.91          |                       |               |                     |               |              |               |
| ASP426D          | 2.54          | TYR537B                  | 3.32          |                       |               |                     |               |              |               |
| HIS516D          | 2.55          | TYR537B                  | 3.91          |                       |               |                     |               |              |               |
| SER518B          | 2.73          |                          |               |                       |               |                     |               |              |               |
| ASN519B          | 1.97          |                          |               |                       |               |                     |               |              |               |
| TYR526B          | 3.27          |                          |               |                       |               |                     |               |              |               |
| ASN532A          | 2.15          |                          |               |                       |               |                     |               |              |               |
| ASN532A          | 3.4           |                          |               |                       |               |                     |               |              |               |
| VAL534B          | 2.46          |                          |               |                       |               |                     |               |              |               |
| PRO535B          | 2.98          |                          |               |                       |               |                     |               |              |               |
| SER536A          | 2.86          |                          |               |                       |               |                     |               |              |               |
| SER536A          | 2.19          |                          |               |                       |               |                     |               |              |               |
| SER536A          | 1.91          |                          |               |                       |               |                     |               |              |               |
| ASP538A          | 2.36          |                          |               |                       |               |                     |               |              |               |
| ASP538A          | 3.46          |                          |               |                       |               |                     |               |              |               |
| ASP538A          | 2.62          |                          |               |                       |               |                     |               |              |               |

**Table S4. Peptide Interactions with PPAR $\alpha$  Using PLIP**

(a) Pep (Y-H-W-Y-G-Y-T-P-Q-N)

| Hydrogen Bonding |               | Hydrophobic Interactions |               | Stacking Interactions |               | Cation Interactions |               | Salt Bridges |               |
|------------------|---------------|--------------------------|---------------|-----------------------|---------------|---------------------|---------------|--------------|---------------|
| Residue          | Distance (Å°) | Residue                  | Distance (Å°) | Residue               | Distance (Å°) | Residue             | Distance (Å°) | Residue      | Distance (Å°) |
| ALA256A          | 3.25          | MET220A                  | 3.62          | -                     | -             | -                   | -             | -            | -             |
| LYS257A          | 2.35          | ILE241A                  | 3.57          |                       |               |                     |               |              |               |
| HIS274A          | 2.43          | LYS257A                  | 3.57          |                       |               |                     |               |              |               |
| HIS274A          | 2.2           | THR279A                  | 3.28          |                       |               |                     |               |              |               |
| THR279A          | 2.81          | VAL281A                  | 3.59          |                       |               |                     |               |              |               |
| LEU331A          | 2.53          | LEU321A                  | 3.74          |                       |               |                     |               |              |               |
| ALA333A          | 2.09          | VAL332A                  | 3.75          |                       |               |                     |               |              |               |
| TYR334A          | 2.87          | VAL332A                  | 3.99          |                       |               |                     |               |              |               |
| TYR334A          | 2.77          | ALA333A                  | 3.7           |                       |               |                     |               |              |               |
| GLY335A          | 2.84          | TYR334A                  | 3.61          |                       |               |                     |               |              |               |
| ALA455A          | 2.76          |                          |               |                       |               |                     |               |              |               |
| HIS457A          | 3.23          |                          |               |                       |               |                     |               |              |               |

(b) Mutation 1 (F-H-W-Y-G-Y-T-P-Q-N)

| Hydrogen Bonding |               | Hydrophobic Interactions |               | Stacking Interactions |               | Cation Interactions |               | Salt Bridges |               |
|------------------|---------------|--------------------------|---------------|-----------------------|---------------|---------------------|---------------|--------------|---------------|
| Residue          | Distance (Å°) | Residue                  | Distance (Å°) | Residue               | Distance (Å°) | Residue             | Distance (Å°) | Residue      | Distance (Å°) |
| LEU254A          | 2.44          | MET220A                  | 3.89          | TYR334A               | 5.05          | -                   | -             | -            | -             |
| ALA256A          | 2.4           | ILE241A                  | 3.54          |                       |               |                     |               |              |               |
| LYS257A          | 2.61          | LYS257A                  | 3.68          |                       |               |                     |               |              |               |
| HIS274A          | 2.27          | THR279A                  | 3.43          |                       |               |                     |               |              |               |
| THR279A          | 2.68          | THR283A                  | 3.82          |                       |               |                     |               |              |               |
| THR283A          | 2.57          | MET320A                  | 3.91          |                       |               |                     |               |              |               |
| THR285A          | 2.1           | LEU321A                  | 3.97          |                       |               |                     |               |              |               |
| ALA333A          | 2.18          | VAL324A                  | 3.53          |                       |               |                     |               |              |               |
| TYR334A          | 3.23          | VAL324A                  | 3.31          |                       |               |                     |               |              |               |
| GLY335A          | 2.71          | VAL332A                  | 3.91          |                       |               |                     |               |              |               |
| HIS457A          | 3.16          | VAL332A                  | 3.77          |                       |               |                     |               |              |               |
| HIS457A          | 2.36          | ALA333A                  | 3.68          |                       |               |                     |               |              |               |
|                  |               | TYR334A                  | 3.6           |                       |               |                     |               |              |               |

## (c) Mutation 2 (Y-I-W-Y-G-Y-T-P-Q-N)

| Hydrogen Bonding |               | Hydrophobic Interactions |               | Stacking Interactions |               | Cation Interactions |               | Salt Bridges |               |
|------------------|---------------|--------------------------|---------------|-----------------------|---------------|---------------------|---------------|--------------|---------------|
| Residue          | Distance (Å°) | Residue                  | Distance (Å°) | Residue               | Distance (Å°) | Residue             | Distance (Å°) | Residue      | Distance (Å°) |
| TYR214A          | 2.27          | MET220A                  | 3.81          | TYR334A               | 4.5           | -                   | -             | -            | -             |
| LYS222A          | 3.29          | ILE241A                  | 3.78          |                       |               |                     |               |              |               |
| LEU254A          | 2.72          | LYS257A                  | 3.72          |                       |               |                     |               |              |               |
| LEU254A          | 2.31          | THR279A                  | 2.92          |                       |               |                     |               |              |               |
| ALA256A          | 2.37          | GLU282A                  | 3.36          |                       |               |                     |               |              |               |
| THR279A          | 2.26          | GLU282A                  | 3.88          |                       |               |                     |               |              |               |
| GLU282A          | 2.01          | MET320A                  | 3.56          |                       |               |                     |               |              |               |
| THR283A          | 3.59          | LEU321A                  | 3.78          |                       |               |                     |               |              |               |
| SER323A          | 2.17          | VAL332A                  | 3.8           |                       |               |                     |               |              |               |
| ALA333A          | 2.16          | ALA333A                  | 3.38          |                       |               |                     |               |              |               |
| TYR334A          | 2.35          | TYR334A                  | 3.69          |                       |               |                     |               |              |               |
| TYR334A          | 2.3           |                          |               |                       |               |                     |               |              |               |
| TYR334A          | 2.33          |                          |               |                       |               |                     |               |              |               |
| GLY335A          | 3.08          |                          |               |                       |               |                     |               |              |               |

## (d) Mutation 3 (Y-H-W-Y-G-Y-T-H-Q-N)

| Hydrogen Bonding |               | Hydrophobic Interactions |               | Stacking Interactions |               | Cation Interactions |               | Salt Bridges |               |
|------------------|---------------|--------------------------|---------------|-----------------------|---------------|---------------------|---------------|--------------|---------------|
| Residue          | Distance (Å°) | Residue                  | Distance (Å°) | Residue               | Distance (Å°) | Residue             | Distance (Å°) | Residue      | Distance (Å°) |
| ASN217A          | 2.66          | MET220A                  | 3.75          | -                     | -             | -                   | -             | -            | -             |
| ASN219A          | 2.7           | ILE241A                  | 3.75          |                       |               |                     |               |              |               |
| ASN219A          | 2.25          | VAL255A                  | 3.97          |                       |               |                     |               |              |               |
| MET220A          | 2.33          | VAL255A                  | 3.69          |                       |               |                     |               |              |               |
| HIS274A          | 2.92          | THR283A                  | 3.95          |                       |               |                     |               |              |               |
| THR279A          | 2.3           | THR285A                  | 3.76          |                       |               |                     |               |              |               |
| THR279A          | 2.76          | GLU286A                  | 3.84          |                       |               |                     |               |              |               |
| GLU282A          | 2.55          | GLU289A                  | 3.84          |                       |               |                     |               |              |               |
| GLU282A          | 3.37          | VAL324A                  | 3.49          |                       |               |                     |               |              |               |
| THR283A          | 2.45          | ALA333A                  | 3.44          |                       |               |                     |               |              |               |
| GLU286A          | 2.73          | TYR334A                  | 3.45          |                       |               |                     |               |              |               |
| GLU289A          | 3.41          | TYR334A                  | 3.98          |                       |               |                     |               |              |               |
| ALA333A          | 2.08          | TYR334A                  | 3.69          |                       |               |                     |               |              |               |
| TYR334A          | 3.14          |                          |               |                       |               |                     |               |              |               |
| TYR334A          | 2.38          |                          |               |                       |               |                     |               |              |               |
| TYR334A          | 3.44          |                          |               |                       |               |                     |               |              |               |



(e) **Mutation 4 (Y-H-W-Y-G-Y-T-P-Q-D)**

| Hydrogen Bonding |               | Hydrophobic Interactions |               | Stacking Interactions |               | Cation Interactions |               | Salt Bridges |               |
|------------------|---------------|--------------------------|---------------|-----------------------|---------------|---------------------|---------------|--------------|---------------|
| Residue          | Distance (Å°) | Residue                  | Distance (Å°) | Residue               | Distance (Å°) | Residue             | Distance (Å°) | Residue      | Distance (Å°) |
| LYS224A          | 2.33          | LYS224A                  | 3.88          | -                     | -             | -                   | -             | LYS224A      | 4.34          |
| SER234A          | 2.5           | ASN236A                  | 3.87          |                       |               |                     |               |              |               |
| THR253A          | 2.2           | ILE241A                  | 3.72          |                       |               |                     |               |              |               |
| HIS274A          | 2.13          | LEU254A                  | 3.61          |                       |               |                     |               |              |               |
| THR279A          | 3.15          | THR279A                  | 3.6           |                       |               |                     |               |              |               |
| THR283A          | 2.28          | VAL324A                  | 3.5           |                       |               |                     |               |              |               |
| ALA333A          | 2.07          | ALA333A                  | 3.48          |                       |               |                     |               |              |               |
| TYR334A          | 3.2           | TYR334A                  | 3.48          |                       |               |                     |               |              |               |
| TYR334A          | 3.23          | TYR334A                  | 3.87          |                       |               |                     |               |              |               |
| TYR334A          | 2.25          | TYR334A                  | 3.72          |                       |               |                     |               |              |               |

**Table S5.** PLIP results for Polyphenol peptide conjugates with PPAR $\alpha$

**S5.** (a) Chlorogenate-Y-H-W-Y-G-Y-T-P-Q-N (original peptide).

| Hydrogen Bonding |               | Hydrophobic Interactions |               | Stacking Interactions |               | Cation Interactions |               | Salt Bridges |               |
|------------------|---------------|--------------------------|---------------|-----------------------|---------------|---------------------|---------------|--------------|---------------|
| Residue          | Distance (Å°) | Residue                  | Distance (Å°) | Residue               | Distance (Å°) | Residue             | Distance (Å°) | Residue      | Distance (Å°) |
| LYS216A          | 2.04          | VAL255A                  | 3.65          | TYR334A               | 3.96          | -                   | -             | -            | -             |
| ASN219A          | 2.32          | VAL255A                  | 3.72          | TYR334A               | 3.69          |                     |               |              |               |
| LEU254A          | 2.16          | LYS257A                  | 3.31          |                       |               |                     |               |              |               |
| CYS278A          | 2.74          | LEU258A                  | 3.77          |                       |               |                     |               |              |               |
| THR279A          | 3.28          | THR279A                  | 3.58          |                       |               |                     |               |              |               |
| THR279A          | 3.68          | VAL281A                  | 3.8           |                       |               |                     |               |              |               |
| THR279A          | 2.26          | GLU282A                  | 3.9           |                       |               |                     |               |              |               |
| THR279A          | 2.2           | GLU282A                  | 3.22          |                       |               |                     |               |              |               |
| GLU282A          | 2.11          | VAL332A                  | 3.49          |                       |               |                     |               |              |               |
| GLU282A          | 1.98          | VAL332A                  | 3.3           |                       |               |                     |               |              |               |
| GLU282A          | 1.9           | TYR334A                  | 3.68          |                       |               |                     |               |              |               |
| GLU282A          | 3.23          | ILE339A                  | 3.88          |                       |               |                     |               |              |               |
| 2GLU82A          | 2.49          | ILE339A                  | 3.97          |                       |               |                     |               |              |               |
| THR285A          | 3.18          | LEU693B                  | 3.78          |                       |               |                     |               |              |               |
| TYR334A          | 3.25          |                          |               |                       |               |                     |               |              |               |
| TYR334A          | 2.22          |                          |               |                       |               |                     |               |              |               |
| GLU696B          | 3.03          |                          |               |                       |               |                     |               |              |               |

**S5. (b) Carnosate- Y-H-W-Y-G-Y-T-P-Q-N (original peptide).**

| Hydrogen Bonding |               | Hydrophobic Interactions |               | Stacking Interactions |               | Cation Interactions |               | Salt Bridges |               |
|------------------|---------------|--------------------------|---------------|-----------------------|---------------|---------------------|---------------|--------------|---------------|
| Residue          | Distance (Å°) | Residue                  | Distance (Å°) | Residue               | Distance (Å°) | Residue             | Distance (Å°) | Residue      | Distance (Å°) |
| LYS224A          | 2.41          | VAL255A                  | 3.62          | TYR334A               | 4.08          | -                   | -             | -            | -             |
| LYS224A          | 2.21          | VAL255A                  | 3.78          |                       |               |                     |               |              |               |
| THR279A          | 2.33          | VAL281A                  | 3.64          |                       |               |                     |               |              |               |
| GLU282A          | 2.89          | GLU282A                  | 3.89          |                       |               |                     |               |              |               |
| GLU282A          | 2.87          | THR285A                  | 3.43          |                       |               |                     |               |              |               |
| TYR334A          | 3.35          | GLU286A                  | 3.74          |                       |               |                     |               |              |               |
| ASN336A          | 1.96          | GLU289A                  | 3.74          |                       |               |                     |               |              |               |
| ASN336A          | 2.47          | TYR334A                  | 3.8           |                       |               |                     |               |              |               |
|                  |               | TYR334A                  | 3.78          |                       |               |                     |               |              |               |

**S5. (c) Gallate- Y-H-W-Y-G-Y-T-P-Q-N (original peptide).**

| Hydrogen Bonding |               | Hydrophobic Interactions |               | Stacking Interactions |               | Cation Interactions |               | Salt Bridges |               |
|------------------|---------------|--------------------------|---------------|-----------------------|---------------|---------------------|---------------|--------------|---------------|
| Residue          | Distance (Å°) | Residue                  | Distance (Å°) | Residue               | Distance (Å°) | Residue             | Distance (Å°) | Residue      | Distance (Å°) |
| ASN219A          | 3.13          | ASN219A                  | 3.44          | -                     | -             | -                   | -             | -            | -             |
| LYS224A          | 2.2           | LYS224A                  | 3.47          |                       |               |                     |               |              |               |
| SER234A          | 3.02          | ILE228A                  | 3.68          |                       |               |                     |               |              |               |
| ASN236A          | 3.38          | ASN236A                  | 3.7           |                       |               |                     |               |              |               |
| ASN236A          | 2.38          | LEU254A                  | 3.87          |                       |               |                     |               |              |               |
| LYS257A          | 2.7           | VAL255A                  | 3.27          |                       |               |                     |               |              |               |
| ILE272A          | 2.54          | LYS257A                  | 3.86          |                       |               |                     |               |              |               |
| ILE272A          | 3.31          | GLU282A                  | 3.77          |                       |               |                     |               |              |               |
| CYS275A          | 3.22          | VAL332A                  | 3.77          |                       |               |                     |               |              |               |
| THR279A          | 3.35          | ALA333A                  | 3.41          |                       |               |                     |               |              |               |
| GLU282A          | 1.99          | TYR334A                  | 3.49          |                       |               |                     |               |              |               |
| ALA333A          | 2.24          | TYR334A                  | 3.54          |                       |               |                     |               |              |               |
| ASN336A          | 2.35          | ILE339A                  | 3.85          |                       |               |                     |               |              |               |
| ASN336A          | 2.91          |                          |               |                       |               |                     |               |              |               |

S5. (d) Rosmarinate-Y-H-W-Y-G-Y-T-P-Q-N (original peptide).

| Hydrogen Bonding |               | Hydrophobic Interactions |               | Stacking Interactions |               | Cation Interactions |               | Salt Bridges |               |
|------------------|---------------|--------------------------|---------------|-----------------------|---------------|---------------------|---------------|--------------|---------------|
| Residue          | Distance (Å°) | Residue                  | Distance (Å°) | Residue               | Distance (Å°) | Residue             | Distance (Å°) | Residue      | Distance (Å°) |
| ASN219A          | 2.84          | MET220A                  | 3.29          | TYR334A               | 3.93          | -                   | -             | -            | -             |
| ASN219A          | 2.15          | LEU254A                  | 3.55          | TYR334A               | 4.71          |                     |               |              |               |
| MET220A          | 2.56          | VAL255A                  | 3.72          |                       |               |                     |               |              |               |
| CYS275A          | 3.49          | VAL255A                  | 3.78          |                       |               |                     |               |              |               |
| THR279A          | 3.42          | LYS257A                  | 3.76          |                       |               |                     |               |              |               |
| THR279A          | 2.97          | LYS257A                  | 3.54          |                       |               |                     |               |              |               |
| THR279A          | 3.37          | THR279A                  | 3.44          |                       |               |                     |               |              |               |
| GLU282A          | 2.06          | ILE317A                  | 3.51          |                       |               |                     |               |              |               |
| THR285A          | 2.35          | PHE318A                  | 3.56          |                       |               |                     |               |              |               |
| GLU286A          | 3.12          | MET320A                  | 3.87          |                       |               |                     |               |              |               |
| GLU286A          | 3.45          | LEU321A                  | 3.31          |                       |               |                     |               |              |               |
| ALA333A          | 2.42          | VAL324A                  | 3.34          |                       |               |                     |               |              |               |
| TYR334A          | 2.4           | VAL324A                  | 3.79          |                       |               |                     |               |              |               |
| ARG692B          | 2.52          | TYR334A                  | 3.8           |                       |               |                     |               |              |               |
|                  |               | TYR334A                  | 3.17          |                       |               |                     |               |              |               |
|                  |               | TYR334A                  | 3.47          |                       |               |                     |               |              |               |
|                  |               | LEU693B                  | 3.76          |                       |               |                     |               |              |               |

S5. (e) Chlorogenate-Mut1 (F-H-W-Y-G-Y-T-P-Q-N) Conjugate with PPAR $\alpha$

| Hydrogen Bonding |               | Hydrophobic Interactions |               | Stacking Interactions |               | Cation Interactions |               | Salt Bridges |               |
|------------------|---------------|--------------------------|---------------|-----------------------|---------------|---------------------|---------------|--------------|---------------|
| Residue          | Distance (Å°) | Residue                  | Distance (Å°) | Residue               | Distance (Å°) | Residue             | Distance (Å°) | Residue      | Distance (Å°) |
| ASN219A          | 2.93          | LEU254A                  | 3.51          | -                     | -             | -                   | -             | -            | -             |
| ASN219A          | 2.27          | VAL255A                  | 3.43          |                       |               |                     |               |              |               |
| HIS274A          | 3.02          | VAL255A                  | 3.43          |                       |               |                     |               |              |               |
| CYS275A          | 2.68          | LYS257A                  | 3.59          |                       |               |                     |               |              |               |
| THR279A          | 2.12          | LYS257A                  | 3.31          |                       |               |                     |               |              |               |
| THR279A          | 2.92          | LEU258A                  | 3.68          |                       |               |                     |               |              |               |
| GLU282A          | 2.28          | GLU282A                  | 3.66          |                       |               |                     |               |              |               |
| THR285A          | 3.37          | THR285A                  | 3.63          |                       |               |                     |               |              |               |
| GLU289A          | 2.28          | GLU286A                  | 3.81          |                       |               |                     |               |              |               |
| GLU289A          | 2.14          | GLU289A                  | 3.53          |                       |               |                     |               |              |               |
| ALA333A          | 2.07          | ALA333A                  | 3.3           |                       |               |                     |               |              |               |
|                  |               | TYR334A                  | 2.9           |                       |               |                     |               |              |               |
|                  |               | TYR334A                  | 3.81          |                       |               |                     |               |              |               |
|                  |               | TYR334A                  | 3.72          |                       |               |                     |               |              |               |

S5. (f) Carnosate-Mut1 (F-H-W-Y-G-Y-T-P-Q-N) Conjugate with PPAR $\alpha$

| Hydrogen Bonding |               | Hydrophobic Interactions |               | Stacking Interactions |               | Cation Interactions |               | Salt Bridges |               |
|------------------|---------------|--------------------------|---------------|-----------------------|---------------|---------------------|---------------|--------------|---------------|
| Residue          | Distance (Å°) | Residue                  | Distance (Å°) | Residue               | Distance (Å°) | Residue             | Distance (Å°) | Residue      | Distance (Å°) |
| HIS274A          | 3.29          | GLU286A                  | 3.57          | TYR334A               | 4.15          | -                   | -             | -            | -             |
| GLU282A          | 2.53          | GLU289A                  | 3.87          |                       |               |                     |               |              |               |
| GLU282A          | 2.54          | TYR334A                  | 3.95          |                       |               |                     |               |              |               |
| GLU289A          | 2.97          | TYR334A                  | 3.63          |                       |               |                     |               |              |               |
| GLU289A          | 2.8           | LEU459A                  | 3.76          |                       |               |                     |               |              |               |
| HIS457A          | 2.68          | ILE689B                  | 3.95          |                       |               |                     |               |              |               |
| ARG692B          | 1.88          | LEU693B                  | 3.96          |                       |               |                     |               |              |               |
| ARG692B          | 2.87          | LEU693B                  | 3.79          |                       |               |                     |               |              |               |
| GLU696B          | 2.24          |                          |               |                       |               |                     |               |              |               |

S5. (g) Gallate-Mut1 (F-H-W-Y-G-Y-T-P-Q-N) Conjugate with PPAR $\alpha$

| Hydrogen Bonding |               | Hydrophobic Interactions |               | Stacking Interactions |               | Cation Interactions |               | Salt Bridges |               |
|------------------|---------------|--------------------------|---------------|-----------------------|---------------|---------------------|---------------|--------------|---------------|
| Residue          | Distance (Å°) | Residue                  | Distance (Å°) | Residue               | Distance (Å°) | Residue             | Distance (Å°) | Residue      | Distance (Å°) |
| ALA256A          | 2.42          | MET220A                  | 3.6           | -                     | -             | -                   | -             | HIS457A      | 4.95          |
| LYS257A          | 2.02          | ILE241A                  | 3.6           |                       |               |                     |               |              |               |
| HIS274A          | 3.25          | LEU247A                  | 3.56          |                       |               |                     |               |              |               |
| THR279A          | 1.92          | GLU251A                  | 3.86          |                       |               |                     |               |              |               |
| THR283A          | 1.96          | VAL255A                  | 3.63          |                       |               |                     |               |              |               |
| THR285A          | 2.31          | LYS257A                  | 3.75          |                       |               |                     |               |              |               |
| THR285A          | 2             | THR279A                  | 3             |                       |               |                     |               |              |               |
| LEU331A          | 1.86          | VAL281A                  | 3.92          |                       |               |                     |               |              |               |
| ALA333A          | 3.19          | VAL324A                  | 3.93          |                       |               |                     |               |              |               |
| TYR334A          | 1.9           | VAL324A                  | 3.68          |                       |               |                     |               |              |               |
|                  |               | VAL332A                  | 3.13          |                       |               |                     |               |              |               |
|                  |               | ALA333A                  | 3.12          |                       |               |                     |               |              |               |
|                  |               | TYR334A                  | 3.68          |                       |               |                     |               |              |               |

**S5. (h) Rosmarinate-Mut1 (F-H-W-Y-G-Y-T-P-Q-N) Conjugate with PPAR $\alpha$**

| Hydrogen Bonding |               | Hydrophobic Interactions |               | Stacking Interactions |               | Cation Interactions |               | Salt Bridges |               |
|------------------|---------------|--------------------------|---------------|-----------------------|---------------|---------------------|---------------|--------------|---------------|
| Residue          | Distance (Å°) | Residue                  | Distance (Å°) | Residue               | Distance (Å°) | Residue             | Distance (Å°) | Residue      | Distance (Å°) |
| THR279A          | 2.48          | ILE241A                  | 3.41          | TYR334A               | 4.61          | HIS274A             | 4.42          | -            | -             |
| THR279A          | 3.54          | LEU247A                  | 3.78          |                       |               |                     |               |              |               |
| SER280A          | 3.24          | VAL255A                  | 3.56          |                       |               |                     |               |              |               |
| SER280A          | 3.24          | ILE272A                  | 3.4           |                       |               |                     |               |              |               |
| GLU282A          | 2.15          | ILE272A                  | 3.59          |                       |               |                     |               |              |               |
| GLU282A          | 2.73          | THR279A                  | 3.07          |                       |               |                     |               |              |               |
| GLU282A          | 2.62          | THR283A                  | 3.76          |                       |               |                     |               |              |               |
| THR285A          | 2.34          | THR285A                  | 3.77          |                       |               |                     |               |              |               |
| MET320A          | 2.11          | PHE318A                  | 3.25          |                       |               |                     |               |              |               |
| ALA333A          | 2.71          | MET320A                  | 3.37          |                       |               |                     |               |              |               |
| TYR334A          | 3.16          | LEU321A                  | 3.51          |                       |               |                     |               |              |               |
| HIS440A          | 2.53          | LEU321A                  | 3.37          |                       |               |                     |               |              |               |
| HIS457A          | 2.03          | VAL332A                  | 3.41          |                       |               |                     |               |              |               |
| ARG692B          | 2.18          | VAL332A                  | 3.79          |                       |               |                     |               |              |               |
| ARG692B          | 2.04          | VAL332A                  | 3.47          |                       |               |                     |               |              |               |
|                  |               | ALA333A                  | 3.52          |                       |               |                     |               |              |               |
|                  |               | TYR334A                  | 4             |                       |               |                     |               |              |               |
|                  |               | ILE339A                  | 3.42          |                       |               |                     |               |              |               |
|                  |               | HIS457A                  | 3.64          |                       |               |                     |               |              |               |
|                  |               | LEU693B                  | 3.57          |                       |               |                     |               |              |               |

**S5. (i) Chlorogenate-Mut2 (Y-I-W-Y-G-Y-T-P-Q-N) Conjugate with PPAR $\alpha$**

| Hydrogen Bonding |               | Hydrophobic Interactions |               | Stacking Interactions |               | Cation Interactions |               | Salt Bridges |               |
|------------------|---------------|--------------------------|---------------|-----------------------|---------------|---------------------|---------------|--------------|---------------|
| Residue          | Distance (Å°) | Residue                  | Distance (Å°) | Residue               | Distance (Å°) | Residue             | Distance (Å°) | Residue      | Distance (Å°) |
| ASN219A          | 2.18          | LEU254A                  | 3.76          | TYR334A               | 5             | -                   | -             | HIS274A      | 5.18          |
| ASN236A          | 2.31          | VAL281A                  | 3.56          |                       |               |                     |               | HIS457A      | 3.87          |
| THR279A          | 3.35          | GLU282A                  | 3.95          |                       |               |                     |               |              |               |
| THR279A          | 3.2           | THR285A                  | 3.38          |                       |               |                     |               |              |               |
| GLU282A          | 2.22          | GLU286A                  | 3.71          |                       |               |                     |               |              |               |
| GLU289A          | 2.94          | GLU289A                  | 3.79          |                       |               |                     |               |              |               |
| ALA333A          | 2.37          | TYR334A                  | 3.71          |                       |               |                     |               |              |               |
| TYR334A          | 2.38          | TYR334A                  | 3.84          |                       |               |                     |               |              |               |
| ASN336A          | 2.09          | TYR334A                  | 3.49          |                       |               |                     |               |              |               |
| ASN336A          | 3.11          | TYR334A                  | 3.83          |                       |               |                     |               |              |               |
| ARG692B          | 1.96          | LEU459A                  | 3.61          |                       |               |                     |               |              |               |
| ARG692B          | 3.37          |                          |               |                       |               |                     |               |              |               |

S5. (j) Carnosate-Mut2 (Y-I-W-Y-G-Y-T-P-Q-N) Conjugate with PPAR $\alpha$

| Hydrogen Bonding |               | Hydrophobic Interactions |               | Stacking Interactions |               | Cation Interactions |               | Salt Bridges |               |
|------------------|---------------|--------------------------|---------------|-----------------------|---------------|---------------------|---------------|--------------|---------------|
| Residue          | Distance (Å°) | Residue                  | Distance (Å°) | Residue               | Distance (Å°) | Residue             | Distance (Å°) | Residue      | Distance (Å°) |
| ASN217A          | 2.38          | VAL281A                  | 3.74          | HIS457A               | 4.53          | ARG692B             | 4.23          | -            | -             |
| ASN219A          | 2.05          | THR285A                  | 3.95          |                       |               |                     |               |              |               |
| LYS257A          | 2             | GLU289A                  | 3.74          |                       |               |                     |               |              |               |
| GLU282A          | 3.14          | TYR334A                  | 3.65          |                       |               |                     |               |              |               |
| THR285A          | 2.48          | ILE689B                  | 3.84          |                       |               |                     |               |              |               |
| GLU289A          | 3.55          | LEU693B                  | 3.93          |                       |               |                     |               |              |               |
| HIS457A          | 2.29          |                          |               |                       |               |                     |               |              |               |
| ARG692B          | 2.72          |                          |               |                       |               |                     |               |              |               |

S5. (k) Gallate-Mut2 (Y-I-W-Y-G-Y-T-P-Q-N) Conjugate with PPAR $\alpha$

| Hydrogen Bonding |               | Hydrophobic Interactions |               | Stacking Interactions |               | Cation Interactions |               | Salt Bridges |               |
|------------------|---------------|--------------------------|---------------|-----------------------|---------------|---------------------|---------------|--------------|---------------|
| Residue          | Distance (Å°) | Residue                  | Distance (Å°) | Residue               | Distance (Å°) | Residue             | Distance (Å°) | Residue      | Distance (Å°) |
| MET220A          | 2.86          | MET220A                  | 3.97          | TYR334A               | 4.16          | -                   | -             | HIS457A      | 3.97          |
| ILE272A          | 2.05          | ILE241A                  | 3.07          |                       |               |                     |               |              |               |
| HIS274A          | 2.69          | LEU247A                  | 3.58          |                       |               |                     |               |              |               |
| CYS276A          | 3.73          | LEU254A                  | 3.9           |                       |               |                     |               |              |               |
| CYS278A          | 2.54          | VAL255A                  | 3.73          |                       |               |                     |               |              |               |
| THR279A          | 2.81          | VAL255A                  | 3.59          |                       |               |                     |               |              |               |
| THR283A          | 2.48          | ILE272A                  | 3.64          |                       |               |                     |               |              |               |
| THR285A          | 1.93          | THR279A                  | 3.55          |                       |               |                     |               |              |               |
| THR285A          | 2.29          | LEU321A                  | 3.45          |                       |               |                     |               |              |               |
| GLU286A          | 2.47          | VAL324A                  | 3.41          |                       |               |                     |               |              |               |
| LEU331A          | 3.18          | VAL324A                  | 3.63          |                       |               |                     |               |              |               |
| ALA333A          | 2.34          | VAL332A                  | 3.12          |                       |               |                     |               |              |               |
| TYR334A          | 2.16          | VAL332A                  | 3.3           |                       |               |                     |               |              |               |
| TYR334A          | 3.31          | VAL332A                  | 3.45          |                       |               |                     |               |              |               |
|                  |               | VAL332A                  | 3.38          |                       |               |                     |               |              |               |
|                  |               | ALA333A                  | 3.35          |                       |               |                     |               |              |               |
|                  |               | ILE339A                  | 3.41          |                       |               |                     |               |              |               |

**S5. (l) Rosmarinate-Mut2 (Y-I-W-Y-G-Y-T-P-Q-N) Conjugate with PPAR $\alpha$**

| Hydrogen Bonding |               | Hydrophobic Interactions |               | Stacking Interactions |               | Cation Interactions |               | Salt Bridges |               |
|------------------|---------------|--------------------------|---------------|-----------------------|---------------|---------------------|---------------|--------------|---------------|
| Residue          | Distance (Å°) | Residue                  | Distance (Å°) | Residue               | Distance (Å°) | Residue             | Distance (Å°) | Residue      | Distance (Å°) |
| LEU215A          | 2.53          | ASN219A                  | 3.63          | -                     | -             | -                   | -             | -            | -             |
| PHE218A          | 2.42          | LYS224A                  | 3.85          |                       |               |                     |               |              |               |
| ASN219A          | 1.92          | LYS224A                  | 3.4           |                       |               |                     |               |              |               |
| ASN221A          | 2.54          | ILE228A                  | 3.59          |                       |               |                     |               |              |               |
| LYS224A          | 2.18          | ASN236A                  | 3.34          |                       |               |                     |               |              |               |
| THR253A          | 2.75          | LEU254A                  | 3.97          |                       |               |                     |               |              |               |
| GLY335A          | 2.76          | TYR334A                  | 3.45          |                       |               |                     |               |              |               |
| ASN336A          | 1.77          | TYR334A                  | 3.6           |                       |               |                     |               |              |               |
|                  |               | TYR334A                  | 3.71          |                       |               |                     |               |              |               |

**S5. (m) Chlorogenate-Mut3 (Y-H-W-Y-G-Y-T-H-Q-N) Conjugate with PPAR $\alpha$**

| Hydrogen Bonding |               | Hydrophobic Interactions |               | Stacking Interactions |               | Cation Interactions |               | Salt Bridges |               |
|------------------|---------------|--------------------------|---------------|-----------------------|---------------|---------------------|---------------|--------------|---------------|
| Residue          | Distance (Å°) | Residue                  | Distance (Å°) | Residue               | Distance (Å°) | Residue             | Distance (Å°) | Residue      | Distance (Å°) |
| ASN217A          | 2.49          | LYS224A                  | 3.67          | -                     | -             | -                   | -             | -            | -             |
| ASN219A          | 3.09          | ILE228A                  | 3.66          |                       |               |                     |               |              |               |
| SER234A          | 2.16          | ILE228A                  | 3.67          |                       |               |                     |               |              |               |
| CYS275A          | 2.6           | LEU254A                  | 3.73          |                       |               |                     |               |              |               |
| THR279A          | 2.17          | VAL255A                  | 3.48          |                       |               |                     |               |              |               |
| TYR334A          | 3.06          | VAL281A                  | 3.84          |                       |               |                     |               |              |               |
| TYR334A          | 2.72          | GLU282A                  | 3.7           |                       |               |                     |               |              |               |
| ASN336A          | 2.09          | GLU286A                  | 3.36          |                       |               |                     |               |              |               |
| ASN336A          | 2.28          | TYR334A                  | 3.78          |                       |               |                     |               |              |               |
| HIS457A          | 1.89          | TYR334A                  | 3.93          |                       |               |                     |               |              |               |
| ARG692B          | 3.46          |                          |               |                       |               |                     |               |              |               |

**S5. (n) Carnosate-Mut3 (Y-H-W-Y-G-Y-T-H-Q-N) Conjugate with PPAR $\alpha$**

| Hydrogen Bonding |               | Hydrophobic Interactions |               | Stacking Interactions |               | Cation Interactions |               | Salt Bridges |               |
|------------------|---------------|--------------------------|---------------|-----------------------|---------------|---------------------|---------------|--------------|---------------|
| Residue          | Distance (Å°) | Residue                  | Distance (Å°) | Residue               | Distance (Å°) | Residue             | Distance (Å°) | Residue      | Distance (Å°) |
| LYS224A          | 2.11          | ASN219A                  | 3.77          | TYR334A               | 5.4           | LYS224A             | 4.07          | -            | -             |
| ASN236A          | 2.53          | LYS224A                  | 3.66          |                       |               |                     |               |              |               |
| LEU254A          | 2.83          | VAL227A                  | 3.52          |                       |               |                     |               |              |               |
| ALA256A          | 2.11          | ILE228A                  | 3.76          |                       |               |                     |               |              |               |
| HIS274A          | 2.22          | ASN236A                  | 3.58          |                       |               |                     |               |              |               |
| TYR334A          | 3.17          | VAL255A                  | 3.33          |                       |               |                     |               |              |               |
| ASN336A          | 2.54          | VAL255A                  | 3.67          |                       |               |                     |               |              |               |
| ASN336A          | 3.07          | LYS257A                  | 3.93          |                       |               |                     |               |              |               |
|                  |               | ALA333A                  | 3.24          |                       |               |                     |               |              |               |
|                  |               | TYR334A                  | 3.71          |                       |               |                     |               |              |               |
|                  |               | TYR334A                  | 3.61          |                       |               |                     |               |              |               |
|                  |               | TYR334A                  | 3.85          |                       |               |                     |               |              |               |

S5. (o) Gallate-Mut3 (Y-H-W-Y-G-Y-T-H-Q-N) Conjugate with PPAR $\alpha$

| Hydrogen Bonding |               | Hydrophobic Interactions |               | Stacking Interactions |               | Cation Interactions |               | Salt Bridges |               |
|------------------|---------------|--------------------------|---------------|-----------------------|---------------|---------------------|---------------|--------------|---------------|
| Residue          | Distance (Å°) | Residue                  | Distance (Å°) | Residue               | Distance (Å°) | Residue             | Distance (Å°) | Residue      | Distance (Å°) |
| HIS274A          | 3.09          | VAL255A                  | 3.31          | HIS274A               | 4.7           | -                   | -             | ARG692B      | 4.42          |
| THR279A          | 2.95          | VAL255A                  | 3.93          |                       |               |                     |               |              |               |
| GLU282A          | 2.4           | LYS257A                  | 3.54          |                       |               |                     |               |              |               |
| THR285A          | 2.34          | THR279A                  | 3.61          |                       |               |                     |               |              |               |
| HIS457A          | 2.38          | VAL281A                  | 3.94          |                       |               |                     |               |              |               |
| ARG692B          | 2.57          | GLU282A                  | 3.79          |                       |               |                     |               |              |               |
|                  |               | TYR334A                  | 3.21          |                       |               |                     |               |              |               |
|                  |               | HIS457A                  | 3.63          |                       |               |                     |               |              |               |
|                  |               | LEU693B                  | 3.78          |                       |               |                     |               |              |               |

S5. (p) Rosmarinate-Mut3 (Y-H-W-Y-G-Y-T-H-Q-N) Conjugate with PPAR $\alpha$

| Hydrogen Bonding |               | Hydrophobic Interactions |               | Stacking Interactions |               | Cation Interactions |               | Salt Bridges |               |
|------------------|---------------|--------------------------|---------------|-----------------------|---------------|---------------------|---------------|--------------|---------------|
| Residue          | Distance (Å°) | Residue                  | Distance (Å°) | Residue               | Distance (Å°) | Residue             | Distance (Å°) | Residue      | Distance (Å°) |
| MET220A          | 3.09          | MET220A                  | 3.9           | TYR334A               | 4.36          | -                   | -             | ARG692B      | 4.39          |
| ALA250A          | 2.71          | LEU254A                  | 3.54          | TYR334A               | 3.99          |                     |               |              |               |
| ALA256A          | 2.59          | VAL255A                  | 3.44          | TYR334A               | 3.76          |                     |               |              |               |
| LYS257A          | 2.53          | VAL255A                  | 3.2           | HIS457A               | 4.34          |                     |               |              |               |
| THR279A          | 3.22          | LYS257A                  | 3.79          |                       |               |                     |               |              |               |
| THR279A          | 2.33          | LEU258A                  | 3.89          |                       |               |                     |               |              |               |
| GLU282A          | 2.15          | THR279A                  | 3.65          |                       |               |                     |               |              |               |
| GLU282A          | 2.88          | VAL281A                  | 3.94          |                       |               |                     |               |              |               |
| THR283A          | 2.34          | GLU282A                  | 3.71          |                       |               |                     |               |              |               |
| THR285A          | 2.21          | ALA333A                  | 3.41          |                       |               |                     |               |              |               |
| HIS457A          | 2.36          | TYR334A                  | 3.31          |                       |               |                     |               |              |               |
| HIS457A          | 2.34          |                          |               |                       |               |                     |               |              |               |
| ARG692B          | 2.61          |                          |               |                       |               |                     |               |              |               |



**S5. (q) Chlorogenate-Mut 4 (Y-H-W-Y-G-Y-T-P-Q-D) Conjugates with PPAR $\alpha$**

| Hydrogen Bonding |               | Hydrophobic Interactions |               | Stacking Interactions |               | Cation Interactions |               | Salt Bridges |               |
|------------------|---------------|--------------------------|---------------|-----------------------|---------------|---------------------|---------------|--------------|---------------|
| Residue          | Distance (Å°) | Residue                  | Distance (Å°) | Residue               | Distance (Å°) | Residue             | Distance (Å°) | Residue      | Distance (Å°) |
| ASN219A          | 3.16          | MET220A                  | 3.19          | TYR334A               | 4.2           | -                   | -             | HIS274A      | 4.88          |
| MET220A          | 2.47          | THR279A                  | 3.68          |                       |               |                     |               |              |               |
| LEU254A          | 3.77          | VAL281A                  | 3.67          |                       |               |                     |               |              |               |
| HIS274A          | 2.23          | TYR334A                  | 3.31          |                       |               |                     |               |              |               |
| GLU282A          | 2.35          | TYR334A                  | 3.42          |                       |               |                     |               |              |               |
| GLU282A          | 2.37          | PRO458A                  | 3.5           |                       |               |                     |               |              |               |
| GLU282A          | 2.66          | ILE689B                  | 3.73          |                       |               |                     |               |              |               |
| GLU282A          | 3.57          |                          |               |                       |               |                     |               |              |               |
| THR285A          | 2.02          |                          |               |                       |               |                     |               |              |               |
| THR285A          | 2.15          |                          |               |                       |               |                     |               |              |               |
| GLU286A          | 2.95          |                          |               |                       |               |                     |               |              |               |
| GLU286A          | 2.47          |                          |               |                       |               |                     |               |              |               |
| ALA333A          | 2.25          |                          |               |                       |               |                     |               |              |               |
| HIS457A          | 2.18          |                          |               |                       |               |                     |               |              |               |
| ARG692B          | 2.15          |                          |               |                       |               |                     |               |              |               |
| ARG692B          | 2.41          |                          |               |                       |               |                     |               |              |               |

**S5. (r) Carnosate-Mut 4 (Y-H-W-Y-G-Y-T-P-Q-D) Conjugates with PPAR $\alpha$**

| Hydrogen Bonding |               | Hydrophobic Interactions |               | Stacking Interactions |               | Cation Interactions |               | Salt Bridges |               |
|------------------|---------------|--------------------------|---------------|-----------------------|---------------|---------------------|---------------|--------------|---------------|
| Residue          | Distance (Å°) | Residue                  | Distance (Å°) | Residue               | Distance (Å°) | Residue             | Distance (Å°) | Residue      | Distance (Å°) |
| LYS222A          | 2.9           | VAL223A                  | 3.65          | -                     | -             | -                   | -             | -            | -             |
| ARG226A          | 2.42          | VAL223A                  | 3.45          |                       |               |                     |               |              |               |
| ARG226A          | 2.12          | ARG226A                  | 3.46          |                       |               |                     |               |              |               |
| ARG226A          | 3.35          | ARG226A                  | 3.8           |                       |               |                     |               |              |               |
| ARG226A          | 3.16          | VAL227A                  | 3.63          |                       |               |                     |               |              |               |
| VAL227A          | 3.15          | ILE228A                  | 3.85          |                       |               |                     |               |              |               |
| SER230A          | 2.43          | LEU229A                  | 3.67          |                       |               |                     |               |              |               |
| SER234A          | 2.42          | LYS232A                  | 3.64          |                       |               |                     |               |              |               |
| ASN236A          | 3.11          | ASN326A                  | 3.84          |                       |               |                     |               |              |               |
| ASN236A          | 2.39          |                          |               |                       |               |                     |               |              |               |
| ASN326A          | 1.99          |                          |               |                       |               |                     |               |              |               |
| LEU370A          | 2.47          |                          |               |                       |               |                     |               |              |               |

**S5. (s) Gallate-Mut4 (Y-H-W-Y-G-Y-T-P-Q-D) Conjugates with PPAR $\alpha$**

| Hydrogen Bonding |               | Hydrophobic Interactions |               | Stacking Interactions |               | Cation Interactions |               | Salt Bridges |               |
|------------------|---------------|--------------------------|---------------|-----------------------|---------------|---------------------|---------------|--------------|---------------|
| Residue          | Distance (Å°) | Residue                  | Distance (Å°) | Residue               | Distance (Å°) | Residue             | Distance (Å°) | Residue      | Distance (Å°) |
| TYR214A          | 2.72          | PHE218A                  | 3.72          | TYR334A               | 4.02          | -                   | -             | -            | -             |
| LYS222A          | 3.48          | VAL255A                  | 3.51          |                       |               |                     |               |              |               |
| LEU254A          | 2.14          | ILE272A                  | 3.62          |                       |               |                     |               |              |               |
| ALA256A          | 2.78          | THR279A                  | 3.52          |                       |               |                     |               |              |               |
| CYS275A          | 3.24          | THR283A                  | 3.46          |                       |               |                     |               |              |               |
| CYS275A          | 2.65          | MET320A                  | 3.64          |                       |               |                     |               |              |               |
| THR279A          | 2.27          | LEU321A                  | 3.91          |                       |               |                     |               |              |               |
| GLU282A          | 3.42          | VAL332A                  | 3.55          |                       |               |                     |               |              |               |
| THR283A          | 2.85          | VAL332A                  | 3.49          |                       |               |                     |               |              |               |
| THR283A          | 3.03          | ILE354A                  | 3.63          |                       |               |                     |               |              |               |
| THR283A          | 2.96          |                          |               |                       |               |                     |               |              |               |
| THR283A          | 3.39          |                          |               |                       |               |                     |               |              |               |
| SER323A          | 2.49          |                          |               |                       |               |                     |               |              |               |
| SER323A          | 2.44          |                          |               |                       |               |                     |               |              |               |
| ALA333A          | 2.23          |                          |               |                       |               |                     |               |              |               |
| TYR334A          | 1.8           |                          |               |                       |               |                     |               |              |               |
| TYR334A          | 3.5           |                          |               |                       |               |                     |               |              |               |
| TYR334A          | 3.41          |                          |               |                       |               |                     |               |              |               |
| GLY335A          | 2.26          |                          |               |                       |               |                     |               |              |               |

**S5. (t) Rosmarinate-Mut 4 (Y-H-W-Y-G-Y-T-P-Q-D) Conjugates with PPAR $\alpha$**

| Hydrogen Bonding |               | Hydrophobic Interactions |               | Stacking Interactions |               | Cation Interactions |               | Salt Bridges |               |
|------------------|---------------|--------------------------|---------------|-----------------------|---------------|---------------------|---------------|--------------|---------------|
| Residue          | Distance (Å°) | Residue                  | Distance (Å°) | Residue               | Distance (Å°) | Residue             | Distance (Å°) | Residue      | Distance (Å°) |
| LEU254A          | 2.06          | LYS257A                  | 3.69          | TYR334A               | 4.18          | HIS457A             | 5.19          | ARG692B      | 5.25          |
| ALA256A          | 3.27          | LYS257A                  | 3.58          |                       |               |                     |               | ARG692B      | 4.56          |
| HIS274A          | 2.68          | THR279A                  | 3.35          |                       |               |                     |               |              |               |
| THR279A          | 2.42          | VAL324A                  | 3.34          |                       |               |                     |               |              |               |
| GLU282A          | 2.46          | VAL332A                  | 3.7           |                       |               |                     |               |              |               |
| GLU282A          | 2.26          | ALA333A                  | 3.84          |                       |               |                     |               |              |               |
| THR283A          | 3.1           | ILE689B                  | 3.78          |                       |               |                     |               |              |               |
| THR283A          | 2.26          |                          |               |                       |               |                     |               |              |               |
| THR285A          | 1.85          |                          |               |                       |               |                     |               |              |               |
| ALA333A          | 1.91          |                          |               |                       |               |                     |               |              |               |
| HIS457A          | 3.57          |                          |               |                       |               |                     |               |              |               |
| ARG692B          | 3.01          |                          |               |                       |               |                     |               |              |               |
| ARG692B          | 2.26          |                          |               |                       |               |                     |               |              |               |

**Table S6.** Peptide Interactions with EGFR Using PLIP  
(a) **Pep** (Y-H-W-Y-G-Y-T-P-Q-N)

| Hydrogen Bonding |               | Hydrophobic Interactions |               | Stacking Interactions |               | Cation Interactions |               | Salt Bridges |               |
|------------------|---------------|--------------------------|---------------|-----------------------|---------------|---------------------|---------------|--------------|---------------|
| Residue          | Distance (Å°) | Residue                  | Distance (Å°) | Residue               | Distance (Å°) | Residue             | Distance (Å°) | Residue      | Distance (Å°) |
| LYS745A          | 3.41          | VAL726A                  | 2.19          | -                     | -             | -                   | -             | -            | -             |
| ASP800A          | 2.78          | ALA743A                  | 3.93          |                       |               |                     |               |              |               |
| ASP800A          | 3.35          | LEU799A                  | 2.68          |                       |               |                     |               |              |               |
| ARG803A          | 2.96          | ASP800A                  | 2.92          |                       |               |                     |               |              |               |
| ARG803A          | 3.16          | ARG841A                  | 2.77          |                       |               |                     |               |              |               |
| THR854A          | 2.8           | ARG841A                  | 2.16          |                       |               |                     |               |              |               |
| LYS913A          | 2.47          | LEU844A                  | 3.42          |                       |               |                     |               |              |               |
|                  |               | LEU844A                  | 2.88          |                       |               |                     |               |              |               |

**S6. (b) Mut 1** (F-H-W-Y-G-Y-T-P-Q-N)

| Hydrogen Bonding |               | Hydrophobic Interactions |               | Stacking Interactions |               | Cation Interactions |               | Salt Bridges |               |
|------------------|---------------|--------------------------|---------------|-----------------------|---------------|---------------------|---------------|--------------|---------------|
| Residue          | Distance (Å°) | Residue                  | Distance (Å°) | Residue               | Distance (Å°) | Residue             | Distance (Å°) | Residue      | Distance (Å°) |
| LYS745A          | 1.51          | LEU718A                  | 3.9           | -                     | -             | -                   | -             | LYS745A      | 4.47          |
| MET793A          | 3.16          | GLY719A                  | 2.22          |                       |               |                     |               |              |               |
| GLY796A          | 2.79          | ASP800A                  | 3.89          |                       |               |                     |               |              |               |
| ASP800A          | 2.1           | ARG841A                  | 3.64          |                       |               |                     |               |              |               |
| ASP855A          | 3.72          | ARG841A                  | 3.97          |                       |               |                     |               |              |               |
| ASN996A          | 2.24          | LEU844A                  | 3.61          |                       |               |                     |               |              |               |

**S6. (c) Mut 2** (Y-I-W-Y-G-Y-T-P-Q-N)

| Hydrogen Bonding |               | Hydrophobic Interactions |               | Stacking Interactions |               | Cation Interactions |               | Salt Bridges |               |
|------------------|---------------|--------------------------|---------------|-----------------------|---------------|---------------------|---------------|--------------|---------------|
| Residue          | Distance (Å°) | Residue                  | Distance (Å°) | Residue               | Distance (Å°) | Residue             | Distance (Å°) | Residue      | Distance (Å°) |
| LEU718A          | 2.72          | LEU718A                  | 3.78          | -                     | -             | -                   | -             | LYS745A      | 4.75          |
| SER720A          | 3.53          | GLY719A                  | 3.63          |                       |               |                     |               |              |               |
| SER720A          | 2.1           | VAL726A                  | 3.97          |                       |               |                     |               |              |               |
| LYS745A          | 1.51          | MET793A                  | 3.47          |                       |               |                     |               |              |               |
| MET793A          | 1.87          | GLU804A                  | 2.97          |                       |               |                     |               |              |               |
| ASN842A          | 2.31          | ARG841A                  | 3.87          |                       |               |                     |               |              |               |
| ASN842A          | 2.56          | LEU844A                  | 2.03          |                       |               |                     |               |              |               |
| THR854A          | 3.16          | LEU844A                  | 2.85          |                       |               |                     |               |              |               |
| ASP855A          | 2.07          | THR854A                  | 3.56          |                       |               |                     |               |              |               |
| ASN996A          | 3.17          | ASP855A                  | 3.89          |                       |               |                     |               |              |               |
|                  |               | LEU1001A                 | 3.58          |                       |               |                     |               |              |               |

**S6. (d) Mut 3 (Y-H-W-Y-G-Y-T-H-Q-N)**

| Hydrogen Bonding |               | Hydrophobic Interactions |               | Stacking Interactions |               | Cation Interactions |               | Salt Bridges |               |
|------------------|---------------|--------------------------|---------------|-----------------------|---------------|---------------------|---------------|--------------|---------------|
| Residue          | Distance (Å°) | Residue                  | Distance (Å°) | Residue               | Distance (Å°) | Residue             | Distance (Å°) | Residue      | Distance (Å°) |
| CYS797A          | 2.74          | GLU804A                  | 3.48          | -                     | -             | -                   | -             | -            | -             |
| ARG803A          | 2.88          | ARG841A                  | 3.03          |                       |               |                     |               |              |               |
| ARG803A          | 3.08          |                          |               |                       |               |                     |               |              |               |
| ASN842A          | 3.55          |                          |               |                       |               |                     |               |              |               |
| LYS913A          | 2.56          |                          |               |                       |               |                     |               |              |               |

**S6. (e) Mut 4 (Y-H-W-Y-G-Y-T-P-Q-D)**

| Hydrogen Bonding |               | Hydrophobic Interactions |               | Stacking Interactions |               | Cation Interactions |               | Salt Bridges |               |
|------------------|---------------|--------------------------|---------------|-----------------------|---------------|---------------------|---------------|--------------|---------------|
| Residue          | Distance (Å°) | Residue                  | Distance (Å°) | Residue               | Distance (Å°) | Residue             | Distance (Å°) | Residue      | Distance (Å°) |
| LYS745A          | 2.59          | VAL726A                  | 3.27          | -                     | -             | -                   | -             | ASP800A      | 3.2           |
| ARG803A          | 3.19          | VAL726A                  | 3.4           |                       |               |                     |               |              |               |
| ASP855A          | 2.6           | LEU844A                  | 3.81          |                       |               |                     |               |              |               |
| LYS913A          | 2.92          | LEU844A                  | 2.61          |                       |               |                     |               |              |               |
|                  |               | LEU1001A                 | 3.4           |                       |               |                     |               |              |               |
|                  |               | LEU1001A                 | 3.38          |                       |               |                     |               |              |               |

**Table S7. Ligand-Residue Interactions using PLIP for Polyphenol-Peptide Conjugate Interactions with EGFR**

a. Chlorogenate-Y-H-W-Y-G-Y-T-P-Q-N (Pep) conjugate

| Hydrogen Bonding |               | Hydrophobic Interactions |               | Stacking Interactions |               | Cation Interactions |               | Salt Bridges |               |
|------------------|---------------|--------------------------|---------------|-----------------------|---------------|---------------------|---------------|--------------|---------------|
| Residue          | Distance (Å°) | Residue                  | Distance (Å°) | Residue               | Distance (Å°) | Residue             | Distance (Å°) | Residue      | Distance (Å°) |
| GLY719A          | 2.81          | SER720A                  | 2.87          | -                     | -             | ARG803A             | 4.67          | -            | -             |
| SER720A          | 2.75          | ALA722A                  | 3.44          |                       |               |                     |               |              |               |
| GLY721A          | 1.35          | LEU799A                  | 2.84          |                       |               |                     |               |              |               |
| CYS797A          | 3.4           | ASP800A                  | 3.83          |                       |               |                     |               |              |               |
| ASP800A          | 2.81          | VAL876A                  | 3.24          |                       |               |                     |               |              |               |
| ARG803A          | 3.64          | PRO877A                  | 2.94          |                       |               |                     |               |              |               |
| ARG841A          | 3.41          |                          |               |                       |               |                     |               |              |               |
| VAL876A          | 2.76          |                          |               |                       |               |                     |               |              |               |

**S7b. Carnosate-Y-H-W-Y-G-Y-T-P-Q-N (Pep) conjugate**

| Hydrogen Bonding |               | Hydrophobic Interactions |               | Stacking Interactions |               | Cation Interactions |               | Salt Bridges |               |
|------------------|---------------|--------------------------|---------------|-----------------------|---------------|---------------------|---------------|--------------|---------------|
| Residue          | Distance (Å°) | Residue                  | Distance (Å°) | Residue               | Distance (Å°) | Residue             | Distance (Å°) | Residue      | Distance (Å°) |
| VAL717A          | 2.66          | SER720A                  | 3.16          | -                     | -             | -                   | -             | -            | -             |
| LEU718A          | 1.31          | LEU799A                  | 2.96          |                       |               |                     |               |              |               |
| SER720A          | 3.11          | ASP800A                  | 1.3           |                       |               |                     |               |              |               |
| SER720A          | 2.73          | ARG841A                  | 2.86          |                       |               |                     |               |              |               |
| SER720A          | 3.43          | LEU844A                  | 2.46          |                       |               |                     |               |              |               |
| LYS745A          | 3.04          | THR854A                  | 3.95          |                       |               |                     |               |              |               |
| CYS797A          | 2.15          | TRP880A                  | 3.8           |                       |               |                     |               |              |               |
|                  |               | LYS913A                  | 3.54          |                       |               |                     |               |              |               |

**S7c. Gallate-Y-H-W-Y-G-Y-T-P-Q-N (Pep) conjugate**

| Hydrogen Bonding |               | Hydrophobic Interactions |               | Stacking Interactions |               | Cation Interactions |               | Salt Bridges |               |
|------------------|---------------|--------------------------|---------------|-----------------------|---------------|---------------------|---------------|--------------|---------------|
| Residue          | Distance (Å°) | Residue                  | Distance (Å°) | Residue               | Distance (Å°) | Residue             | Distance (Å°) | Residue      | Distance (Å°) |
| CYS797A          | 3.1           | LEU718A                  | 2.47          | -                     | -             | ARG841A             | 3.07          | -            | -             |
| ASP800A          | 2.79          | VAL726A                  | 3.43          |                       |               |                     |               |              |               |
| ASP800A          | 3.21          | ARG841A                  | 2.5           |                       |               |                     |               |              |               |
| ARG803A          | 2.98          | ARG841A                  | 3.09          |                       |               |                     |               |              |               |
| ARG803A          | 3.42          | TRP880A                  | 3.62          |                       |               |                     |               |              |               |
| ARG841A          | 3             | LEU1001A                 | 3.84          |                       |               |                     |               |              |               |

**S7d. Rosmarinate-Y-H-W-Y-G-Y-T-P-Q-N (Pep) conjugate**

| Hydrogen Bonding |               | Hydrophobic Interactions |               | Stacking Interactions |               | Cation Interactions |               | Salt Bridges |               |
|------------------|---------------|--------------------------|---------------|-----------------------|---------------|---------------------|---------------|--------------|---------------|
| Residue          | Distance (Å°) | Residue                  | Distance (Å°) | Residue               | Distance (Å°) | Residue             | Distance (Å°) | Residue      | Distance (Å°) |
| SER720A          | 2.57          | LEU718A                  | 2.17          | -                     | -             | -                   | -             | -            | -             |
| SER720A          | 3.06          | SER720A                  | 3.96          |                       |               |                     |               |              |               |
| SER720A          | 3.13          | ALA722A                  | 3.73          |                       |               |                     |               |              |               |
| SER720A          | 3.11          | VAL726A                  | 3.95          |                       |               |                     |               |              |               |
| LYS745A          | 3.08          | ARG803A                  | 3.84          |                       |               |                     |               |              |               |
| ARG803A          | 1.87          | ARG803A                  | 3.22          |                       |               |                     |               |              |               |
| GLU804A          | 2.31          | GLU804A                  | 2.06          |                       |               |                     |               |              |               |
| PHE910A          | 2.81          | ASN996A                  | 3.37          |                       |               |                     |               |              |               |
| ASN996A          | 3.11          | LEU1001A                 | 2.9           |                       |               |                     |               |              |               |
| PHE997A          | 3.09          |                          |               |                       |               |                     |               |              |               |

**S7e. Chlorogenate-F-H-W-Y-G-Y-T-P-Q-N Mut1 conjugate**

| Hydrogen Bonding |               | Hydrophobic Interactions |               | Stacking Interactions |               | Cation Interactions |               | Salt Bridges |               |
|------------------|---------------|--------------------------|---------------|-----------------------|---------------|---------------------|---------------|--------------|---------------|
| Residue          | Distance (Å°) | Residue                  | Distance (Å°) | Residue               | Distance (Å°) | Residue             | Distance (Å°) | Residue      | Distance (Å°) |
| LEU718A          | 2.92          | SER720A                  | 3.09          | -                     | -             | -                   | -             | LYS913A      | 4.36          |
| SER720A          | 1.96          | VAL726A                  | 3.72          |                       |               |                     |               |              |               |
| ALA722A          | 2.12          | ASP855A                  | 3.92          |                       |               |                     |               |              |               |
| ALA722A          | 3.19          | TRP880A                  | 3.24          |                       |               |                     |               |              |               |
| GLY724A          | 1.29          | TRP880A                  | 3.44          |                       |               |                     |               |              |               |
| ARG803A          | 2.85          | LYS913A                  | 1.3           |                       |               |                     |               |              |               |
| ARG841A          | 1.98          | LYS913A                  | 3.31          |                       |               |                     |               |              |               |
| LYS913A          | 2.3           |                          |               |                       |               |                     |               |              |               |
| LYS913A          | 2.8           |                          |               |                       |               |                     |               |              |               |
| ASP916A          | 2.17          |                          |               |                       |               |                     |               |              |               |

**S7f. Carnosate-F-H-W-Y-G-Y-T-P-Q-N Mut1 conjugate**

| Hydrogen Bonding |               | Hydrophobic Interactions |               | Stacking Interactions |               | Cation Interactions |               | Salt Bridges |               |
|------------------|---------------|--------------------------|---------------|-----------------------|---------------|---------------------|---------------|--------------|---------------|
| Residue          | Distance (Å°) | Residue                  | Distance (Å°) | Residue               | Distance (Å°) | Residue             | Distance (Å°) | Residue      | Distance (Å°) |
| CYS797A          | 1.82          | LEU718A                  | 2.95          | -                     | -             | -                   | -             | -            | -             |
| ASP800A          | 2.14          | LEU718A                  | 3.48          |                       |               |                     |               |              |               |
| ASP800A          | 2.14          | GLY719A                  | 3.6           |                       |               |                     |               |              |               |
| ARG803A          | 2.33          | SER720A                  | 3.59          |                       |               |                     |               |              |               |
| ARG803A          | 2.6           | VAL726A                  | 2.68          |                       |               |                     |               |              |               |
| ARG841A          | 3.17          | VAL726A                  | 3.84          |                       |               |                     |               |              |               |
| ARG841A          | 1.56          | ALA743A                  | 3.84          |                       |               |                     |               |              |               |
| VAL876A          | 3.35          | LEU799A                  | 2.77          |                       |               |                     |               |              |               |
| ALA920A          | 1.8           | ASN842A                  | 3.93          |                       |               |                     |               |              |               |
| SER921A          | 2.5           | LEU844A                  | 3.04          |                       |               |                     |               |              |               |
|                  |               | THR854A                  | 2.79          |                       |               |                     |               |              |               |
|                  |               | ASP855A                  | 3.9           |                       |               |                     |               |              |               |
|                  |               | VAL876A                  | 3.9           |                       |               |                     |               |              |               |
|                  |               | LYS879A                  | 3.31          |                       |               |                     |               |              |               |
|                  |               | TRP880A                  | 3.31          |                       |               |                     |               |              |               |

**S7g. Gallate-F-H-W-Y-G-Y-T-P-Q-N Mut 1 conjugate**

| Hydrogen Bonding |               | Hydrophobic Interactions |               | Stacking Interactions |               | Cation Interactions |               | Salt Bridges |               |
|------------------|---------------|--------------------------|---------------|-----------------------|---------------|---------------------|---------------|--------------|---------------|
| Residue          | Distance (Å°) | Residue                  | Distance (Å°) | Residue               | Distance (Å°) | Residue             | Distance (Å°) | Residue      | Distance (Å°) |
| SER720A          | 2.98          | LEU718A                  | 3.24          | TRP880A               | 4.9           | ARG841A             | 3.54          | -            | -             |
| LYS745A          | 3.23          | LEU718A                  | 3.26          | TRP880A               | 2.8           |                     |               |              |               |
| MET793A          | 2.73          | VAL726A                  | 3.51          |                       |               |                     |               |              |               |
| MET793A          | 2.4           | LEU844A                  | 3.83          |                       |               |                     |               |              |               |
| THR854A          | 3.1           | LEU844A                  | 1.86          |                       |               |                     |               |              |               |
| THR854A          | 2.71          | THR854A                  | 3.42          |                       |               |                     |               |              |               |
| THR854A          | 2.26          | TRP880A                  | 3.86          |                       |               |                     |               |              |               |
| ASP855A          | 2.88          | PRO914A                  | 3.91          |                       |               |                     |               |              |               |
| ASP855A          | 2.85          |                          |               |                       |               |                     |               |              |               |

**S7h. Rosmarinate-F-H-W-Y-G-Y-T-P-Q-N Mut1 conjugate**

| Hydrogen Bonding |               | Hydrophobic Interactions |               | Stacking Interactions |               | Cation Interactions |               | Salt Bridges |               |
|------------------|---------------|--------------------------|---------------|-----------------------|---------------|---------------------|---------------|--------------|---------------|
| Residue          | Distance (Å°) | Residue                  | Distance (Å°) | Residue               | Distance (Å°) | Residue             | Distance (Å°) | Residue      | Distance (Å°) |
| LEU718A          | 2.31          | GLY719A                  | 3.66          | -                     | -             | LYS879A             | 2.47          | LYS879A      | 5.47          |
| SER720A          | 1.95          | GLY721A                  | 3.44          |                       |               |                     |               |              |               |
| GLY721A          | 3.27          | GLY721A                  | 3.63          |                       |               |                     |               |              |               |
| CYS797A          | 2.95          | ALA722A                  | 1.31          |                       |               |                     |               |              |               |
| ASP800A          | 3.51          | PHE723A                  | 2.75          |                       |               |                     |               |              |               |
| ASP800A          | 3.65          | VAL726A                  | 2.61          |                       |               |                     |               |              |               |
| LYS879A          | 3.1           | LEU799A                  | 3.75          |                       |               |                     |               |              |               |
| GLY911A          | 2.42          | ASP800A                  | 3.01          |                       |               |                     |               |              |               |
| LYS913A          | 3.17          | ARG841A                  | 3.79          |                       |               |                     |               |              |               |
| ALA920A          | 1.45          | LEU844A                  | 3.56          |                       |               |                     |               |              |               |
|                  |               | THR854A                  | 3.51          |                       |               |                     |               |              |               |
|                  |               | LYS879A                  | 3.23          |                       |               |                     |               |              |               |
|                  |               | ALA920A                  | 3             |                       |               |                     |               |              |               |

**S7i. Chlorogenate-Y-I-W-Y-G-Y-T-P-Q-N Mut2 conjugate**

| Hydrogen Bonding |               | Hydrophobic Interactions |               | Stacking Interactions |               | Cation Interactions |               | Salt Bridges |               |
|------------------|---------------|--------------------------|---------------|-----------------------|---------------|---------------------|---------------|--------------|---------------|
| Residue          | Distance (Å°) | Residue                  | Distance (Å°) | Residue               | Distance (Å°) | Residue             | Distance (Å°) | Residue      | Distance (Å°) |
| VAL717A          | 2.65          | VAL717A                  | 3.25          | -                     | -             | -                   | -             | ARG841A      | 4.41          |
| SER720A          | 2.26          | LEU718A                  | 3.08          |                       |               |                     |               |              |               |
| SER720A          | 2.16          | LEU718A                  | 2.86          |                       |               |                     |               |              |               |
| SER720A          | 1.79          | ASP800A                  | 3.65          |                       |               |                     |               |              |               |
| ALA722A          | 2.84          | ARG841A                  | 3.99          |                       |               |                     |               |              |               |
| ARG841A          | 2.93          | ARG841A                  | 3.59          |                       |               |                     |               |              |               |
| ARG841A          | 1.21          | LEU1001A                 | 2.96          |                       |               |                     |               |              |               |
| ARG841A          | 1.34          |                          |               |                       |               |                     |               |              |               |

|         |     |  |  |  |  |  |  |  |  |
|---------|-----|--|--|--|--|--|--|--|--|
| LYS913A | 3.3 |  |  |  |  |  |  |  |  |
|---------|-----|--|--|--|--|--|--|--|--|

**S7j.** Carnosate-Y-I-W-Y-G-Y-T-P-Q-N Mut2 conjugate

| Hydrogen Bonding |               | Hydrophobic Interactions |               | Stacking Interactions |               | Cation Interactions |               | Salt Bridges |               |
|------------------|---------------|--------------------------|---------------|-----------------------|---------------|---------------------|---------------|--------------|---------------|
| Residue          | Distance (Å°) | Residue                  | Distance (Å°) | Residue               | Distance (Å°) | Residue             | Distance (Å°) | Residue      | Distance (Å°) |
| LEU718A          | 2.59          | LEU718A                  | 2.21          |                       |               |                     |               | ARG841A      | 5.38          |
| SER720A          | 3.02          | SER720A                  | 3.44          |                       |               |                     |               |              |               |
| SER720A          | 3.13          | ALA722A                  | 3.83          |                       |               |                     |               |              |               |
| ARG841A          | 2.92          | VAL726A                  | 3.97          |                       |               |                     |               |              |               |
|                  |               | LEU799A                  | 3.89          |                       |               |                     |               |              |               |
|                  |               | ASP800A                  | 3.6           |                       |               |                     |               |              |               |
|                  |               | LEU844A                  | 3.07          |                       |               |                     |               |              |               |
|                  |               | TRP880A                  | 3.18          |                       |               |                     |               |              |               |
|                  |               | LEU1001A                 | 3.56          |                       |               |                     |               |              |               |
|                  |               | LEU1001A                 | 2.49          |                       |               |                     |               |              |               |

**S7k.** Gallate-Y-I-W-Y-G-Y-T-P-Q-N Mut 2 conjugate

| Hydrogen Bonding |               | Hydrophobic Interactions |               | Stacking Interactions |               | Cation Interactions |               | Salt Bridges |               |
|------------------|---------------|--------------------------|---------------|-----------------------|---------------|---------------------|---------------|--------------|---------------|
| Residue          | Distance (Å°) | Residue                  | Distance (Å°) | Residue               | Distance (Å°) | Residue             | Distance (Å°) | Residue      | Distance (Å°) |
| TYR801A          | 3.2           | PRO794A                  | 3.6           | -                     | -             | -                   | -             | -            | -             |
| LYS846A          | 3.04          | PHE795A                  | 3.41          |                       |               |                     |               |              |               |
| GLN849A          | 3.27          | ASN808A                  | 3.05          |                       |               |                     |               |              |               |
| MET987A          | 2.02          | TYR813A                  | 2.36          |                       |               |                     |               |              |               |
| MET987A          | 3.43          | LYS846A                  | 3.63          |                       |               |                     |               |              |               |
| ASN996A          | 1.83          | THR847A                  | 2.7           |                       |               |                     |               |              |               |
|                  |               | PHE997A                  | 3.94          |                       |               |                     |               |              |               |
|                  |               | PHE997A                  | 3.48          |                       |               |                     |               |              |               |
|                  |               | TYR998A                  | 4             |                       |               |                     |               |              |               |
|                  |               | ARG999A                  | 3.58          |                       |               |                     |               |              |               |
|                  |               | ASP1012A                 | 3.13          |                       |               |                     |               |              |               |

**S7l.** Rosmarinate-Y-I-W-Y-G-Y-T-P-Q-N Mut 2 conjugate

| Hydrogen Bonding |               | Hydrophobic Interactions |               | Stacking Interactions |               | Cation Interactions |               | Salt Bridges |               |
|------------------|---------------|--------------------------|---------------|-----------------------|---------------|---------------------|---------------|--------------|---------------|
| Residue          | Distance (Å°) | Residue                  | Distance (Å°) | Residue               | Distance (Å°) | Residue             | Distance (Å°) | Residue      | Distance (Å°) |
| ALA722A          | 2.44          | SER720A                  | 2.6           |                       |               |                     |               | ARG803A      | 4.23          |
| ASP800A          | 3.12          | ALA722A                  | 3.52          |                       |               |                     |               | LYS879A      | 5.43          |
| ARG841A          | 2.96          | ARG803A                  | 3.26          |                       |               |                     |               |              |               |
| VAL876A          | 1.6           | ARG841A                  | 3.31          |                       |               |                     |               |              |               |
| LYS879A          | 2.42          | TRP880A                  | 2.27          |                       |               |                     |               |              |               |
| GLY917A          | 2.62          | TRP880A                  | 3.23          |                       |               |                     |               |              |               |
| GLY917A          | 2.83          |                          |               |                       |               |                     |               |              |               |
| ALA920A          | 1.33          |                          |               |                       |               |                     |               |              |               |



**Table S7m.** Chlorogenate-Y-H-W-Y-G-Y-T-H-Q-N Mut 3 conjugate

| Hydrogen Bonding |               | Hydrophobic Interactions |               | Stacking Interactions |               | Cation Interactions |               | Salt Bridges |               |
|------------------|---------------|--------------------------|---------------|-----------------------|---------------|---------------------|---------------|--------------|---------------|
| Residue          | Distance (Å°) | Residue                  | Distance (Å°) | Residue               | Distance (Å°) | Residue             | Distance (Å°) | Residue      | Distance (Å°) |
| SER720A          | 3             | LEU718A                  | 3.11          | -                     | -             | -                   | -             | ARG841A      | 4.25          |
| SER720A          | 3.12          | GLY719A                  | 3.28          |                       |               |                     |               |              |               |
| ALA722A          | 2.99          | SER720A                  | 3.82          |                       |               |                     |               |              |               |
| LYS745A          | 2.9           | LEU799A                  | 3.32          |                       |               |                     |               |              |               |
| ASP800A          | 3             | ASP800A                  | 3.68          |                       |               |                     |               |              |               |
| ARG803A          | 2.04          | GLU804A                  | 3.37          |                       |               |                     |               |              |               |
| ARG803A          | 1.87          | ASN996A                  | 3.94          |                       |               |                     |               |              |               |
| ARG803A          | 2.12          |                          |               |                       |               |                     |               |              |               |
| ASN842A          | 3.3           |                          |               |                       |               |                     |               |              |               |
| ASN996A          | 3.1           |                          |               |                       |               |                     |               |              |               |

**S7n.** Carnosate-Y-H-W-Y-G-Y-T-H-Q-N Mut 3 conjugate

| Hydrogen Bonding |               | Hydrophobic Interactions |               | Stacking Interactions |               | Cation Interactions |               | Salt Bridges |               |
|------------------|---------------|--------------------------|---------------|-----------------------|---------------|---------------------|---------------|--------------|---------------|
| Residue          | Distance (Å°) | Residue                  | Distance (Å°) | Residue               | Distance (Å°) | Residue             | Distance (Å°) | Residue      | Distance (Å°) |
| LYS745A          | 2.99          | ALA722A                  | 1.49          | PHE723A               | 4.7           | -                   | -             | -            | -             |
| ARG841A          | 3.05          | VAL726A                  | 3.79          |                       |               |                     |               |              |               |
| ARG841A          | 3.34          | VAL726A                  | 1.97          |                       |               |                     |               |              |               |
| ARG841A          | 2.78          | ARG841A                  | 3.84          |                       |               |                     |               |              |               |
| VAL876A          | 3.09          | LEU844A                  | 2.67          |                       |               |                     |               |              |               |
| LYS879A          | 3.21          | LEU844A                  | 2.8           |                       |               |                     |               |              |               |
| ILE918A          | 3.08          | THR854A                  | 2.56          |                       |               |                     |               |              |               |
| ALA920A          | 2.36          | VAL876A                  | 2.05          |                       |               |                     |               |              |               |
|                  |               | ILE878A                  | 4             |                       |               |                     |               |              |               |
|                  |               | TRP880A                  | 3.19          |                       |               |                     |               |              |               |

**S7o.** Gallate-Y-H-W-Y-G-Y-T-H-Q-N Mut 3 conjugate

| Hydrogen Bonding |               | Hydrophobic Interactions |               | Stacking Interactions |               | Cation Interactions |               | Salt Bridges |               |
|------------------|---------------|--------------------------|---------------|-----------------------|---------------|---------------------|---------------|--------------|---------------|
| Residue          | Distance (Å°) | Residue                  | Distance (Å°) | Residue               | Distance (Å°) | Residue             | Distance (Å°) | Residue      | Distance (Å°) |
| LEU718A          | 1.74          | LEU718A                  | 3.83          | -                     | -             | -                   | -             | -            | -             |
| CYS797A          | 2.64          | VAL726A                  | 3.81          |                       |               |                     |               |              |               |
| ASP800A          | 1.96          | VAL726A                  | 3.99          |                       |               |                     |               |              |               |
| ASP800A          | 2.98          | ASP800A                  | 3.19          |                       |               |                     |               |              |               |
| ARG841A          | 2.85          | ARG841A                  | 3.84          |                       |               |                     |               |              |               |
| ARG841A          | 1.89          | ARG841A                  | 3.06          |                       |               |                     |               |              |               |
| ASN842A          | 2.97          | LEU844A                  | 3.72          |                       |               |                     |               |              |               |
| ASN842A          | 2.63          | TRP880A                  | 2.31          |                       |               |                     |               |              |               |
|                  |               | TRP880A                  | 3.55          |                       |               |                     |               |              |               |

**S7p.** Rosmarinate-Y-H-W-Y-G-Y-T-H-Q-N Mut3 conjugate

| Hydrogen Bonding |               | Hydrophobic Interactions |               | Stacking Interactions |               | Cation Interactions |               | Salt Bridges |               |
|------------------|---------------|--------------------------|---------------|-----------------------|---------------|---------------------|---------------|--------------|---------------|
| Residue          | Distance (Å°) | Residue                  | Distance (Å°) | Residue               | Distance (Å°) | Residue             | Distance (Å°) | Residue      | Distance (Å°) |
| VAL717A          | 0.81          | LEU718A                  | 3.88          | -                     | -             | -                   | -             | -            | -             |
| VAL717A          | 1.03          | GLY719A                  | 3.76          |                       |               |                     |               |              |               |
| GLY719A          | 3.01          | LEU799A                  | 3.38          |                       |               |                     |               |              |               |
| SER720A          | 1.65          | ASP800A                  | 3.47          |                       |               |                     |               |              |               |
| ARG803A          | 2.85          | LYS879A                  | 3.13          |                       |               |                     |               |              |               |
| ARG803A          | 2.89          | TRP880A                  | 3.68          |                       |               |                     |               |              |               |
| VAL876A          | 1.41          | TRP880A                  | 3.93          |                       |               |                     |               |              |               |
| LYS913A          | 1.17          |                          |               |                       |               |                     |               |              |               |

**S7q.** Chlorogenate-Y-H-W-Y-G-Y-T-P-Q-D Mut4 conjugate

| Hydrogen Bonding |               | Hydrophobic Interactions |               | Stacking Interactions |               | Cation Interactions |               | Salt Bridges |               |
|------------------|---------------|--------------------------|---------------|-----------------------|---------------|---------------------|---------------|--------------|---------------|
| Residue          | Distance (Å°) | Residue                  | Distance (Å°) | Residue               | Distance (Å°) | Residue             | Distance (Å°) | Residue      | Distance (Å°) |
| VAL717A          | 2.57          | LYS716A                  | 3.42          | -                     | -             | -                   | -             | LYS745A      | 3.49          |
| VAL717A          | 2.22          | LEU718A                  | 3.69          |                       |               |                     |               |              |               |
| LEU718A          | 2.56          | LEU718A                  | 3.48          |                       |               |                     |               |              |               |
| GLY719A          | 3.33          | GLY719A                  | 2.62          |                       |               |                     |               |              |               |
| GLY719A          | 3.34          | LEU844A                  | 3.43          |                       |               |                     |               |              |               |
| SER720A          | 3.33          | LEU1001A                 | 3.8           |                       |               |                     |               |              |               |
| SER720A          | 2.5           | LEU1001A                 | 2.55          |                       |               |                     |               |              |               |
| GLY721A          | 2.88          |                          |               |                       |               |                     |               |              |               |
| LYS728A          | 3.23          |                          |               |                       |               |                     |               |              |               |
| ASP800A          | 2.1           |                          |               |                       |               |                     |               |              |               |
| ALA1000A         | 2.39          |                          |               |                       |               |                     |               |              |               |
| ASP1003A         | 0.97          |                          |               |                       |               |                     |               |              |               |
| ASP1003A         | 0.87          |                          |               |                       |               |                     |               |              |               |

**S7r.** Carnosate-Y-H-W-Y-G-Y-T-P-Q-D Mutation 4 conjugate

| Hydrogen Bonding |               | Hydrophobic Interactions |               | Stacking Interactions |               | Cation Interactions |               | Salt Bridges |               |
|------------------|---------------|--------------------------|---------------|-----------------------|---------------|---------------------|---------------|--------------|---------------|
| Residue          | Distance (Å°) | Residue                  | Distance (Å°) | Residue               | Distance (Å°) | Residue             | Distance (Å°) | Residue      | Distance (Å°) |
| ALA722A          | 2.76          | GLY719A                  | 3.12          | -                     | -             | -                   | -             | -            | -             |
| PHE723A          | 3.22          | GLY719A                  | 3.38          |                       |               |                     |               |              |               |
| LYS745A          | 3.72          | PHE723A                  | 3.68          |                       |               |                     |               |              |               |
| ARG748A          | 3.5           | VAL726A                  | 1.5           |                       |               |                     |               |              |               |
| ARG841A          | 2.88          | ALA743A                  | 2.84          |                       |               |                     |               |              |               |
| THR854A          | 3.26          | THR854A                  | 3.73          |                       |               |                     |               |              |               |
| GLY863A          | 3.1           | GLU866A                  | 3.87          |                       |               |                     |               |              |               |
| GLY863A          | 2.73          | PRO877A                  | 2.89          |                       |               |                     |               |              |               |
| VAL876A          | 2.28          |                          |               |                       |               |                     |               |              |               |
| VAL876A          | 3.6           |                          |               |                       |               |                     |               |              |               |
| ARG889A          | 3.29          |                          |               |                       |               |                     |               |              |               |
| ARG889A          | 1.78          |                          |               |                       |               |                     |               |              |               |

**S7s.** Gallate-Y-H-W-Y-G-Y-T-P-Q-D Mut4 conjugate

| Hydrogen Bonding |               | Hydrophobic Interactions |               | Stacking Interactions |               | Cation Interactions |               | Salt Bridges |               |
|------------------|---------------|--------------------------|---------------|-----------------------|---------------|---------------------|---------------|--------------|---------------|
| Residue          | Distance (Å°) | Residue                  | Distance (Å°) | Residue               | Distance (Å°) | Residue             | Distance (Å°) | Residue      | Distance (Å°) |
| GLY719A          | 1.92          | PHE723A                  | 3.46          | -                     | -             | -                   | -             | ARG841A      | 4.05          |
| SER720A          | 2.37          | VAL726A                  | 2.93          |                       |               |                     |               |              |               |
| SER720A          | 1.24          | VAL726A                  | 3.94          |                       |               |                     |               |              |               |
| GLY721A          | 3.39          | LEU844A                  | 3.08          |                       |               |                     |               |              |               |
| GLY721A          | 2.16          | LEU844A                  | 2.85          |                       |               |                     |               |              |               |
| ALA722A          | 1.97          |                          |               |                       |               |                     |               |              |               |
| ALA722A          | 2.62          |                          |               |                       |               |                     |               |              |               |
| ALA722A          | 2.87          |                          |               |                       |               |                     |               |              |               |
| PHE723A          | 1.64          |                          |               |                       |               |                     |               |              |               |
| GLY724A          | 2.33          |                          |               |                       |               |                     |               |              |               |
| LYS745A          | 2.89          |                          |               |                       |               |                     |               |              |               |
| ASP800A          | 2.8           |                          |               |                       |               |                     |               |              |               |
| ARG803A          | 1.9           |                          |               |                       |               |                     |               |              |               |
| GLU804A          | 3.63          |                          |               |                       |               |                     |               |              |               |
| ASN842A          | 2.31          |                          |               |                       |               |                     |               |              |               |
| ASN842A          | 3.24          |                          |               |                       |               |                     |               |              |               |
| ASN996A          | 3.11          |                          |               |                       |               |                     |               |              |               |

**S7t.** Rosmarinate-Y-H-W-Y-G-Y-T-P-Q-D Mut4 conjugate

| Hydrogen Bonding |               | Hydrophobic Interactions |               | Stacking Interactions |               | Cation Interactions |               | Salt Bridges |               |
|------------------|---------------|--------------------------|---------------|-----------------------|---------------|---------------------|---------------|--------------|---------------|
| Residue          | Distance (Å°) | Residue                  | Distance (Å°) | Residue               | Distance (Å°) | Residue             | Distance (Å°) | Residue      | Distance (Å°) |
| GLY719A          | 2.39          | LEU718A                  | 3.91          | -                     | -             | -                   | -             | -            | -             |
| SER720A          | 2.63          | VAL726A                  | 3.55          |                       |               |                     |               |              |               |
| GLY721A          | 3.4           | ALA743A                  | 3.37          |                       |               |                     |               |              |               |
| PHE723A          | 2.3           | ASP800A                  | 3.58          |                       |               |                     |               |              |               |
| VAL726A          | 3.1           | ARG841A                  | 2.82          |                       |               |                     |               |              |               |
| GLN791A          | 3.22          | ARG841A                  | 3.31          |                       |               |                     |               |              |               |
| MET793A          | 2.37          | LEU844A                  | 2.55          |                       |               |                     |               |              |               |
| CYS797A          | 1.37          | TYR998A                  | 3.73          |                       |               |                     |               |              |               |
| ASP800A          | 3.28          | LEU1001A                 | 3.2           |                       |               |                     |               |              |               |
| ASP800A          | 2.23          |                          |               |                       |               |                     |               |              |               |
| ARG803A          | 3.17          |                          |               |                       |               |                     |               |              |               |
| GLU804A          | 2.56          |                          |               |                       |               |                     |               |              |               |
| GLU804A          | 2.76          |                          |               |                       |               |                     |               |              |               |
| ASN996A          | 2.6           |                          |               |                       |               |                     |               |              |               |

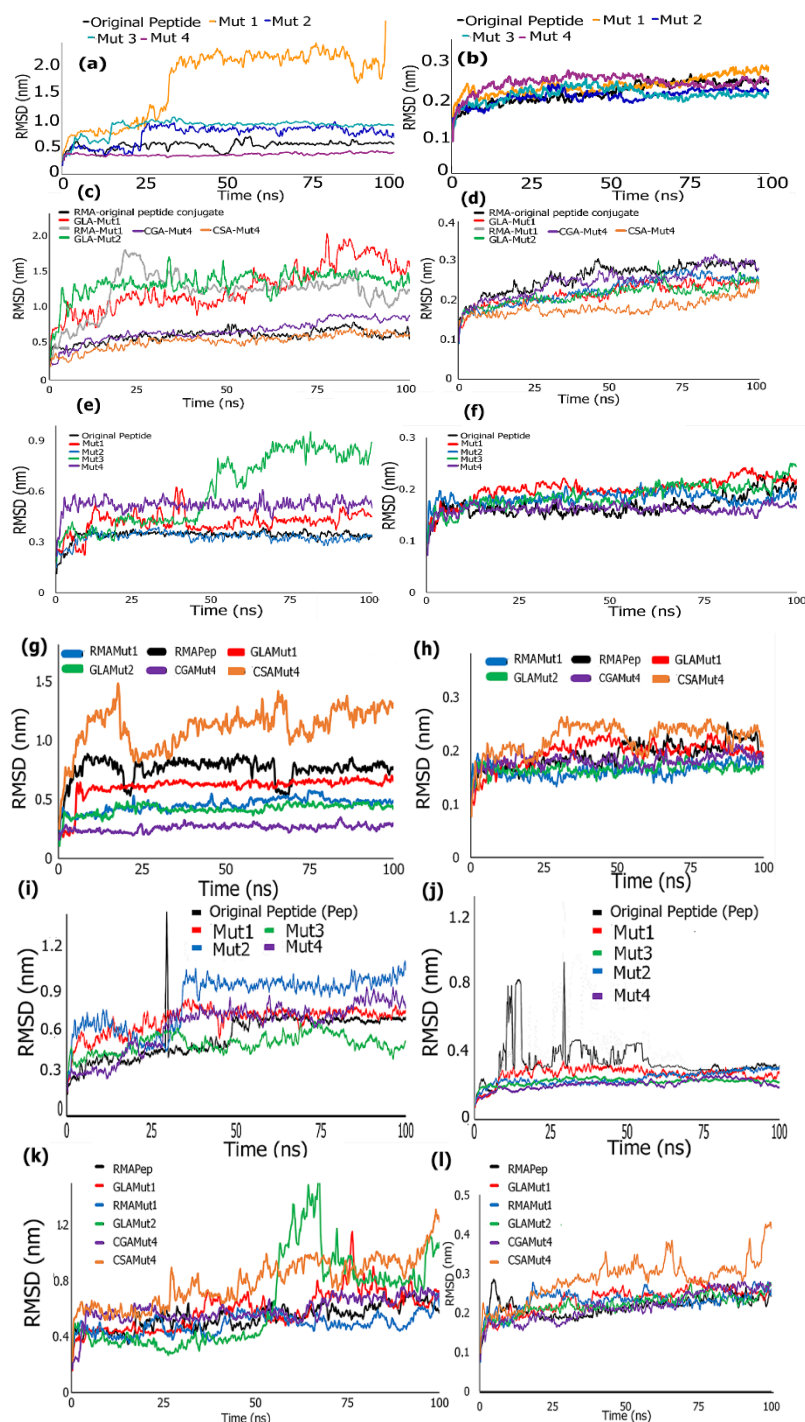

**Figure S1.** (a) RMSD plots of various peptides with ER- $\alpha$  receptor. (b) Corresponding C $\alpha$  plots of ER- $\alpha$  receptor. (c) RMSD plots of various peptide-polyphenol conjugates with ER- $\alpha$  receptor; (d) Corresponding C $\alpha$  plots of ER- $\alpha$  receptor. (e) RMSD plots of various peptides with PPAR- $\alpha$  receptor. (f) Corresponding C $\alpha$  plots of PPAR- $\alpha$  receptor. (g) RMSD plots of various peptide-polyphenol conjugates with PPAR- $\alpha$  receptor; (h) Corresponding C $\alpha$  plots of PPAR- $\alpha$  receptor; (i) RMSD plots of various peptides with EGFR receptor. (j) Corresponding C $\alpha$  plots of EGFR receptor. (k) RMSD plots of various peptide-polyphenol conjugates with EGFR receptor; (l) Corresponding C $\alpha$  plots of EGFR receptor

| PEPTIDE                  | 0 ns                                                                                | 25 ns                                                                               | 50ns                                                                                 | 75ns                                                                                  | 100ns                                                                                 |
|--------------------------|-------------------------------------------------------------------------------------|-------------------------------------------------------------------------------------|--------------------------------------------------------------------------------------|---------------------------------------------------------------------------------------|---------------------------------------------------------------------------------------|
| YHWYGYTPQN<br>(original) |    |    |    |    |    |
| FHWYGYTPQN<br>(Mut1)     |    |    |    |    |    |
| YIWYGYTPQN<br>(Mut2)     |   |   |   |   |   |
| YHWYGYTHQN<br>(Mut3)     |  |  |  |  |  |
| YHWYGYTPQD<br>(Mut4)     |  |  |  |  |  |

**Figure S2.** Trajectory images obtained during MD simulation of original peptide and the four mutated peptides at 0, 25, 50, 75 and 100 ns showing interactions of the peptides with the ER $\alpha$  receptor.

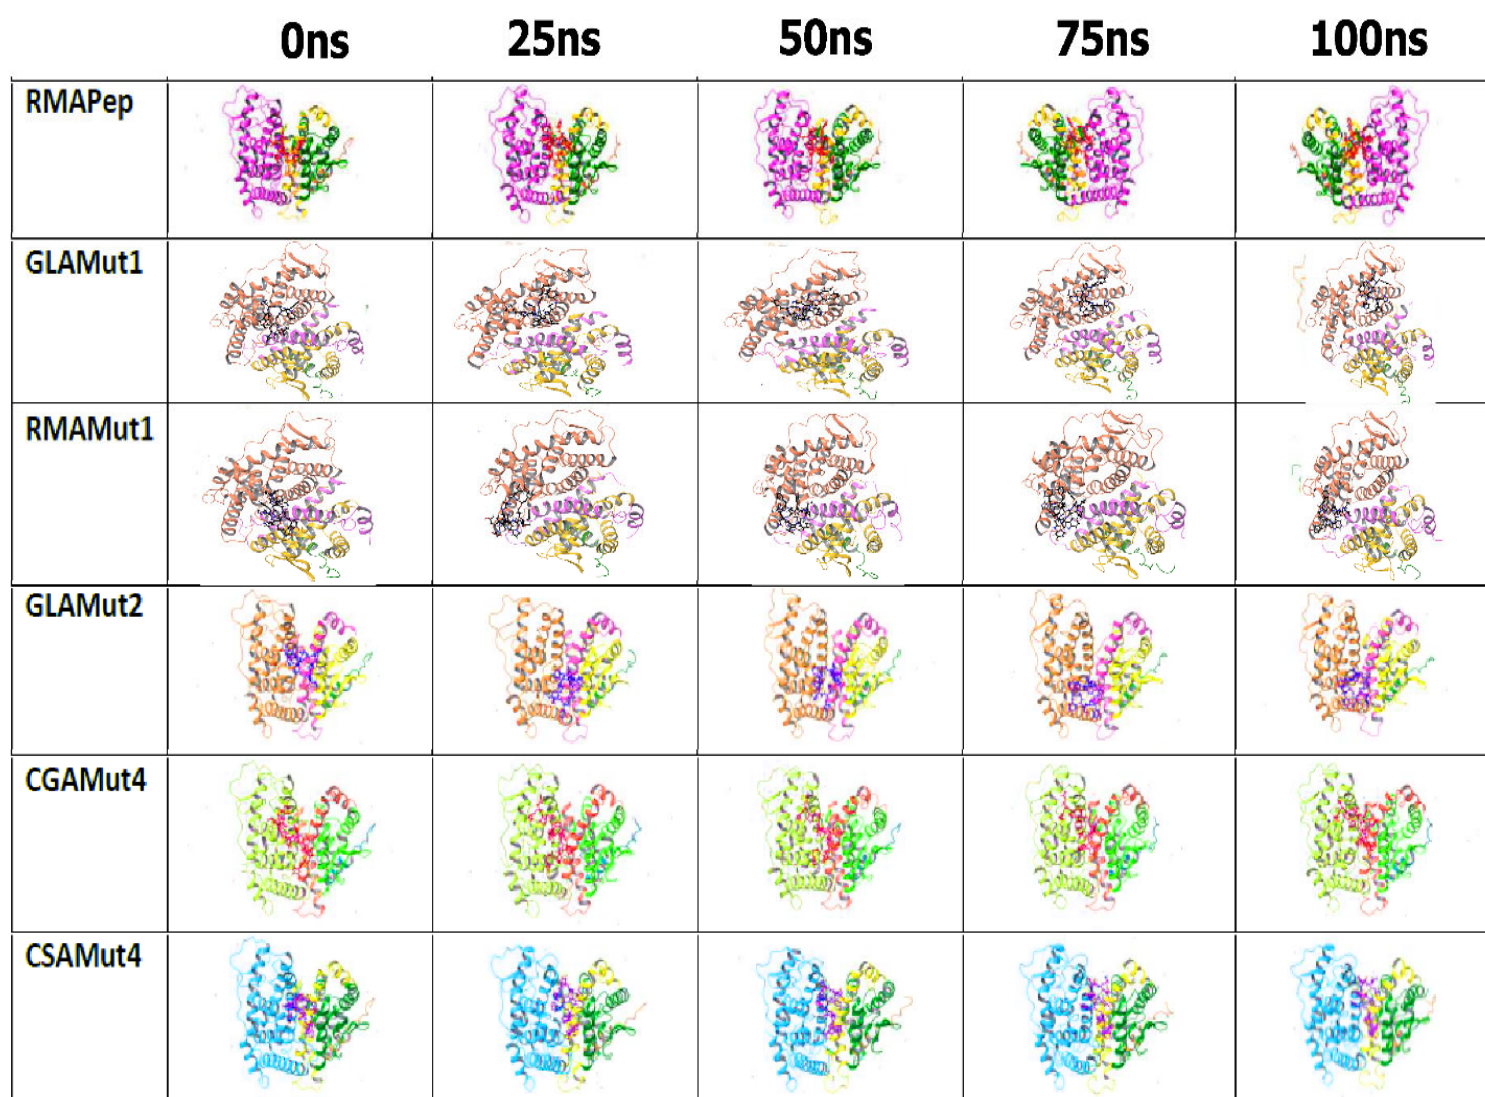

**Figure S3.** Trajectory images obtained during MD simulation of peptide-polyphenol conjugates at 0, 25, 50, 75 and 100 ns showing interactions of the peptides with the ER $\alpha$  receptor



| PEPTIDE                  | 0 (ns)                                                                              | 25 (ns)                                                                             | 50 (ns)                                                                             | 75 (ns)                                                                               | 100 (ns)                                                                              |
|--------------------------|-------------------------------------------------------------------------------------|-------------------------------------------------------------------------------------|-------------------------------------------------------------------------------------|---------------------------------------------------------------------------------------|---------------------------------------------------------------------------------------|
| YHWYGYTPQN<br>(original) |    |    |    |    |    |
| FHWYGYTPQN<br>(Mut1)     |    |    |    |    |    |
| YIWYGYTPQN<br>(Mut2)     |    |    |    |    |    |
| YHWYGYTHQN<br>(Mut3)     |   |   |   |   |   |
| YHWYGYTPQD<br>(Mut4)     |  |  |  |  |  |

**Figure S4.** Trajectory images over 100 ns molecular dynamics simulation of peptide complexes with PPAR $\alpha$ .

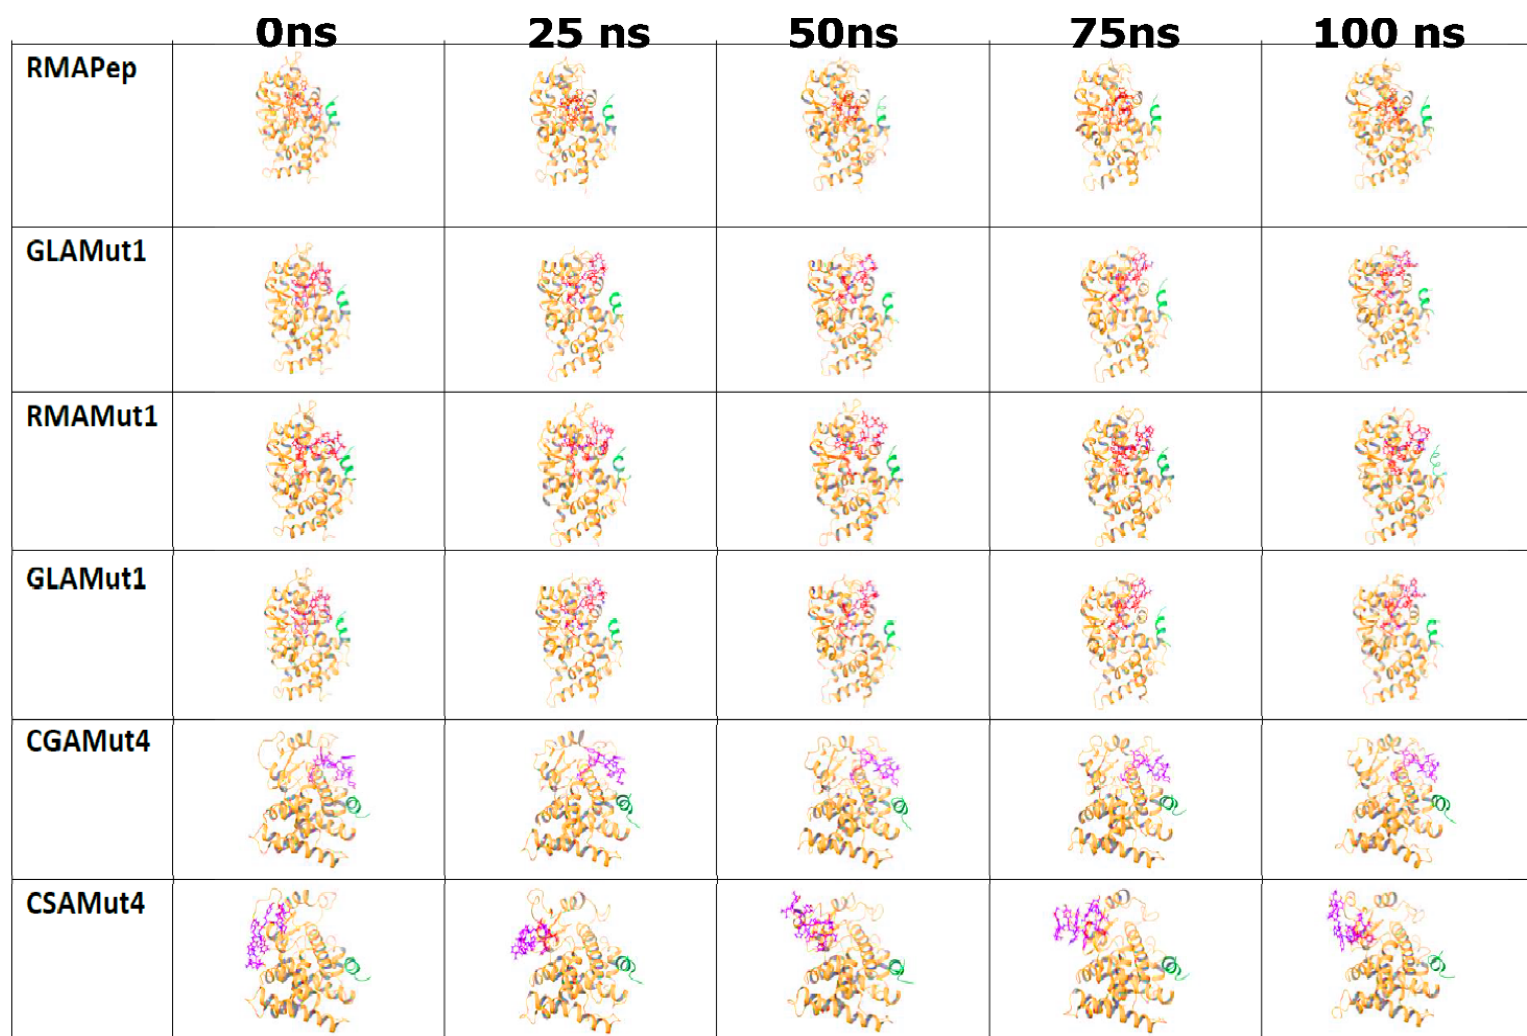

**Figure S5.** Trajectory images over 100 ns molecular dynamics simulation of polyphenol-peptide conjugate complexes with PPAR $\alpha$ . The ligand is shown in pink.



| PEPTIDE                  | 0 (ns)                                                                             | 25 (ns)                                                                            | 50 (ns)                                                                             | 75 (ns)                                                                              | 100 (ns)                                                                             |
|--------------------------|------------------------------------------------------------------------------------|------------------------------------------------------------------------------------|-------------------------------------------------------------------------------------|--------------------------------------------------------------------------------------|--------------------------------------------------------------------------------------|
| YHWYGYTPQN<br>(original) | 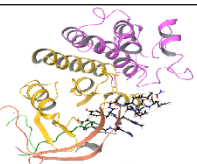  |   |   |   |   |
| FHWYGYTPQN<br>(Mut1)     |   |   |   |   |   |
| YIHWYGYTPQN<br>(Mut2)    |   |   |   |   |   |
| YHWYGYTHQN<br>(Mut3)     |   |   |   |   |   |
| YHWYGYTPQD<br>(Mut4)     |  |  |  |  |  |

**Figure S6.** Trajectory images over 100 ns molecular dynamics simulation of peptide complexes with EGFR.

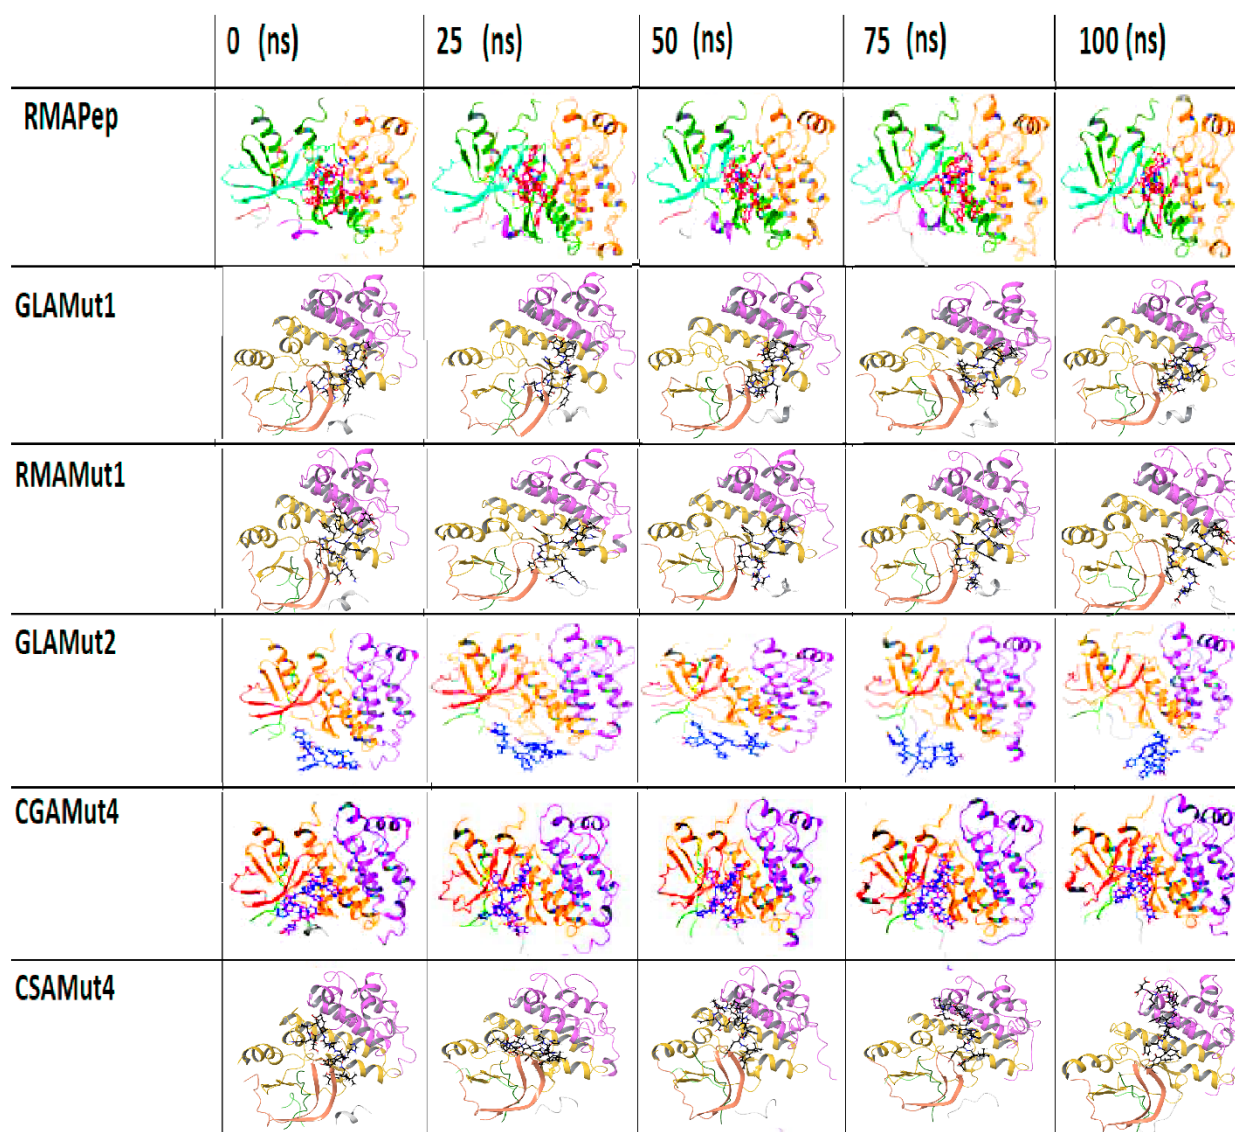

**Figure S7.** Trajectory images over 100 ns molecular dynamics simulation of polyphenol-peptide conjugate complexes with EGFR.

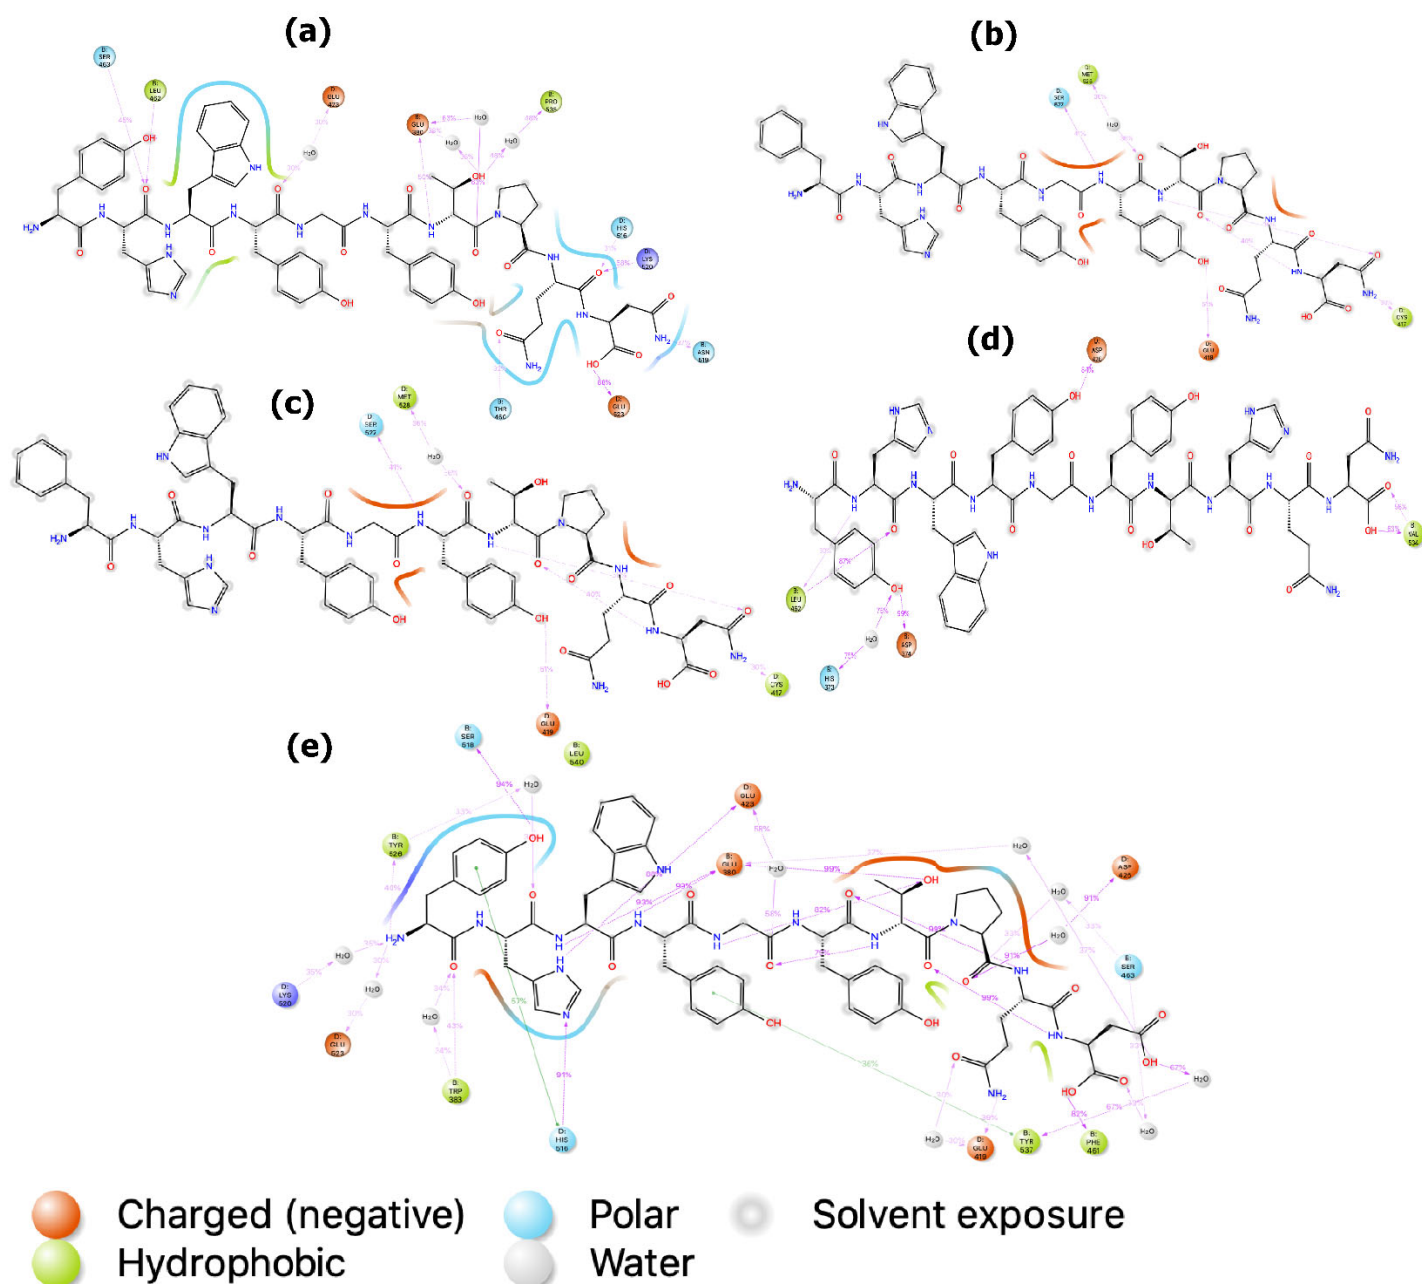

**Figure S8.** Schematic of ligand atom interactions with the ER $\alpha$  receptor protein residues. Interactions that occur more than **30.0%** of the simulation time are shown. (a) Pep; (b) Mut1; (c) Mut2; (d) Mut3; (e) Mut4

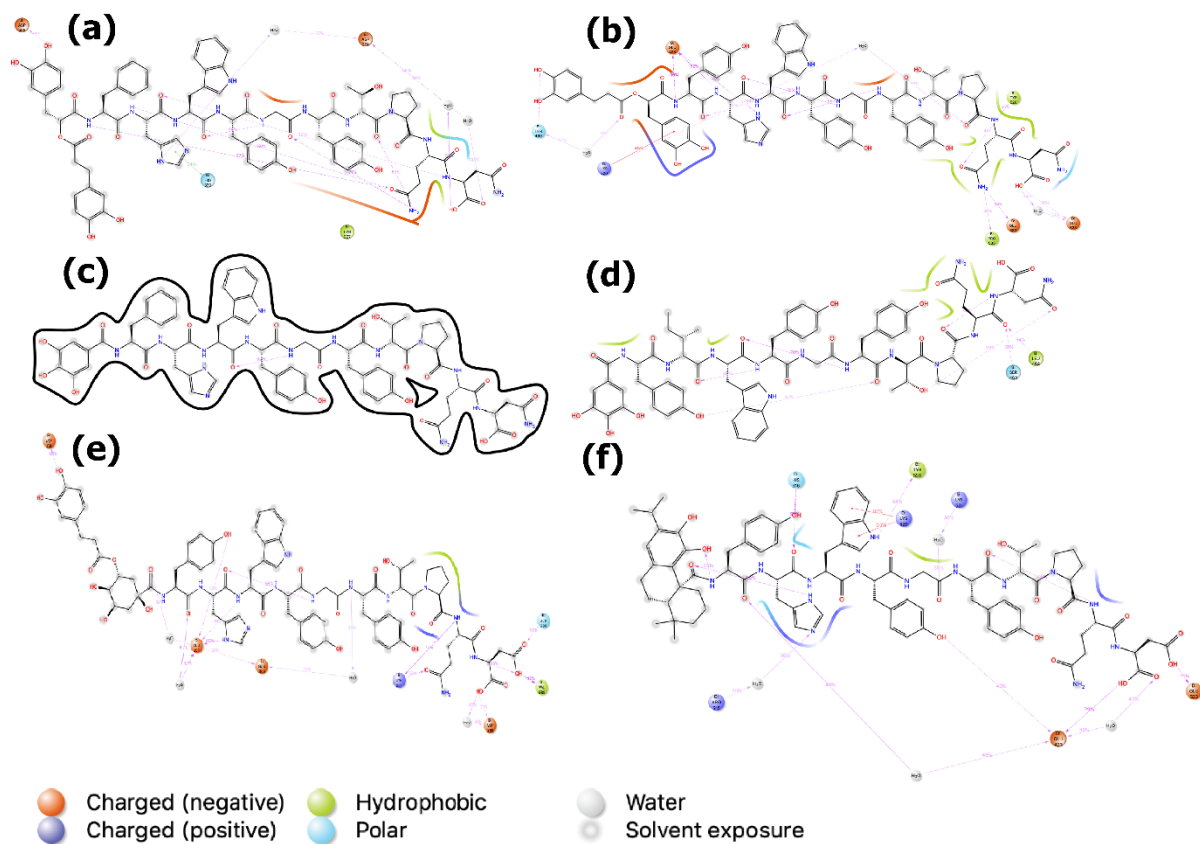

**Figure S9.** Schematic of ligand atom interactions with the ER $\alpha$  receptor protein residues. Interactions that occur more than **30.0%** of the simulation time are shown. (a) RMA-Mut1; (b) RMA-Pep; (c) GLA-Mut1; (d) GLA-Mut2; (e) CGA-Mut4; (f) CSA-Mut4



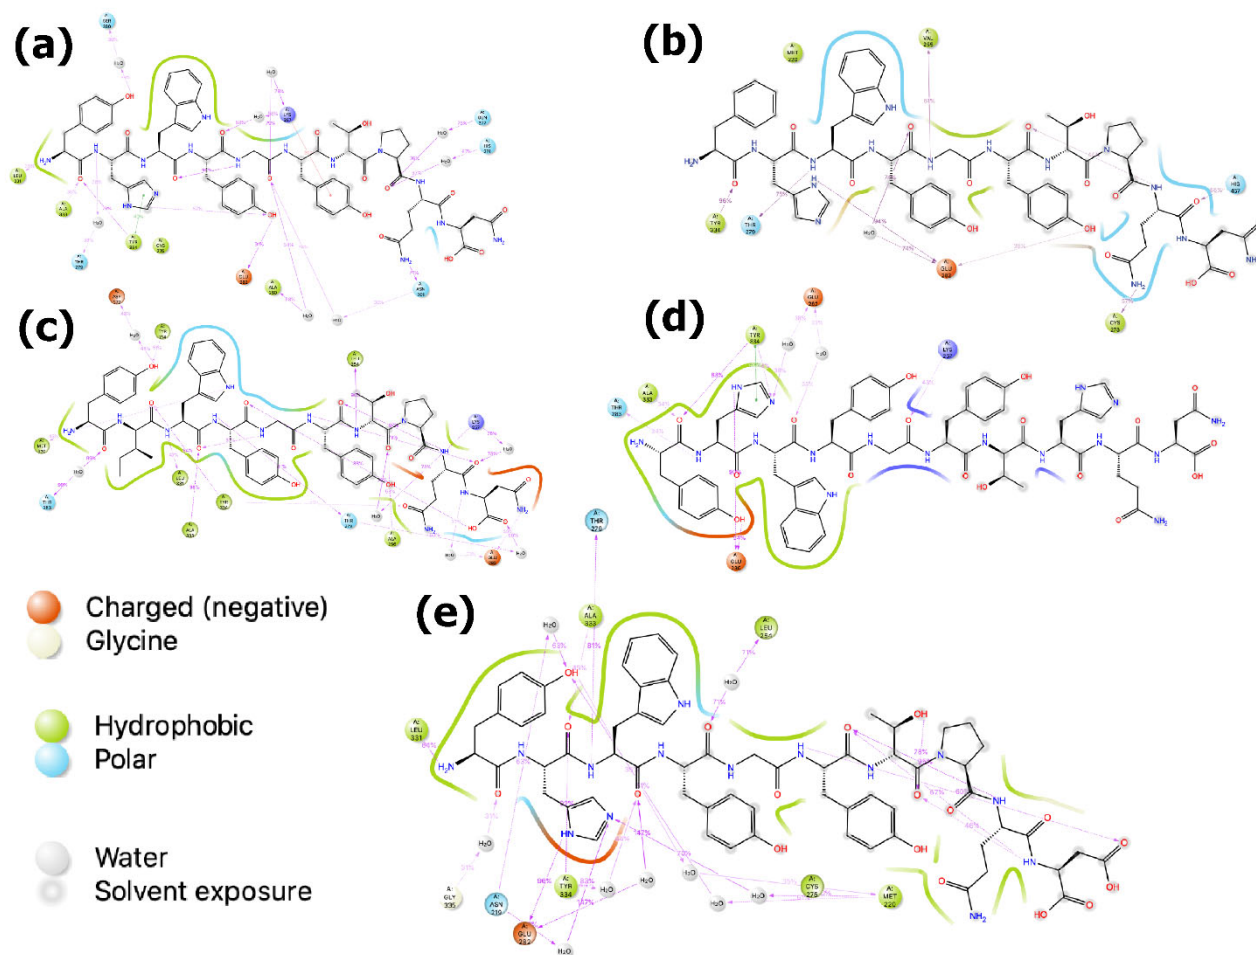

**Figure S10.** Schematic of ligand atom interactions with the PPAR $\alpha$  receptor protein residues. Interactions that occur more than **30.0%** of the simulation time are shown. (a) Pep; (b) Mut1; (c) Mut2; (d) Mut3; (e) Mut4

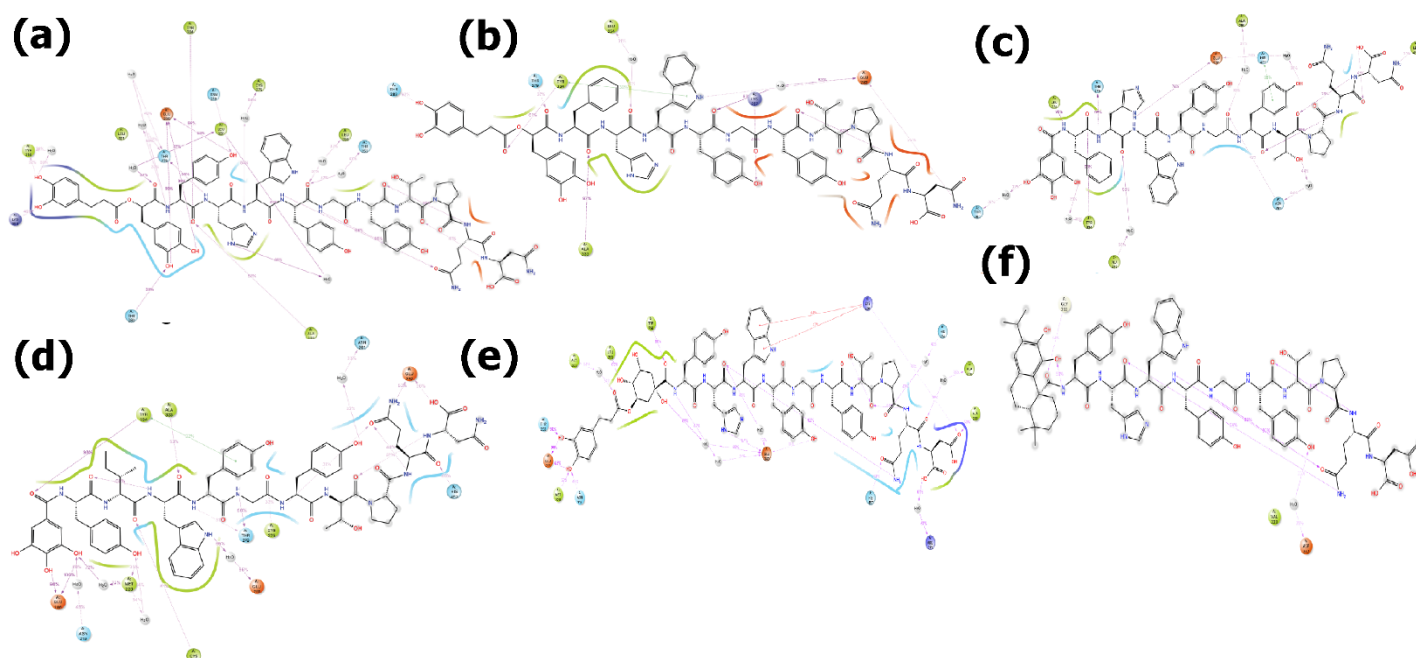

**Figure S11.** Schematic of ligand atom interactions with the PPAR $\alpha$  receptor protein residues. Interactions that occur more than **30.0%** of the simulation time are shown (a) with RMA-Pep conjugate; (b) with RMA-Mut1 conjugate; (c) with GLA-Mut1 conjugate (d) with GLA-Mut2 conjugate; (e) with CGA-Mut4 conjugate; (f) with CSA-Mut4 conjugate

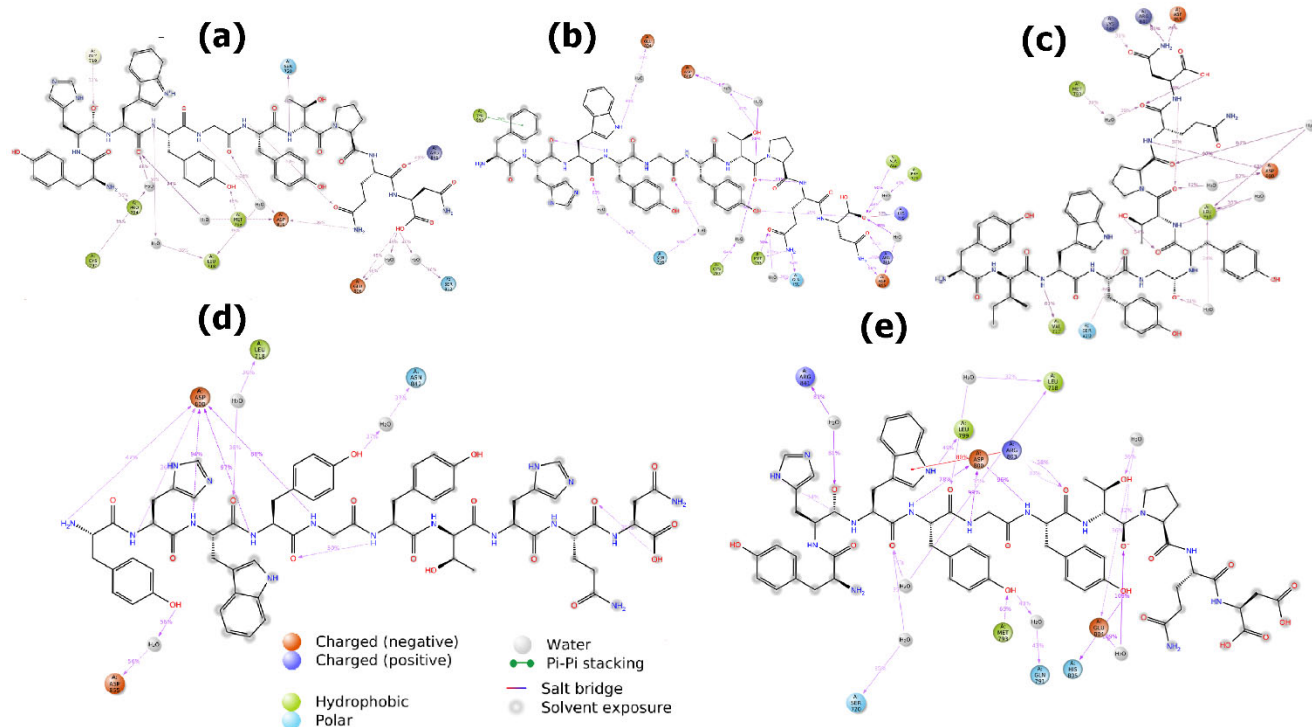

**Figure S12.** Schematic of ligand atom interactions with the EGFR receptor protein residues. Interactions that occur more than **30.0%** of the simulation time are shown. (a) Pep; (b) Mut1; (c) Mut2; (d) Mut3; (e) Mut4

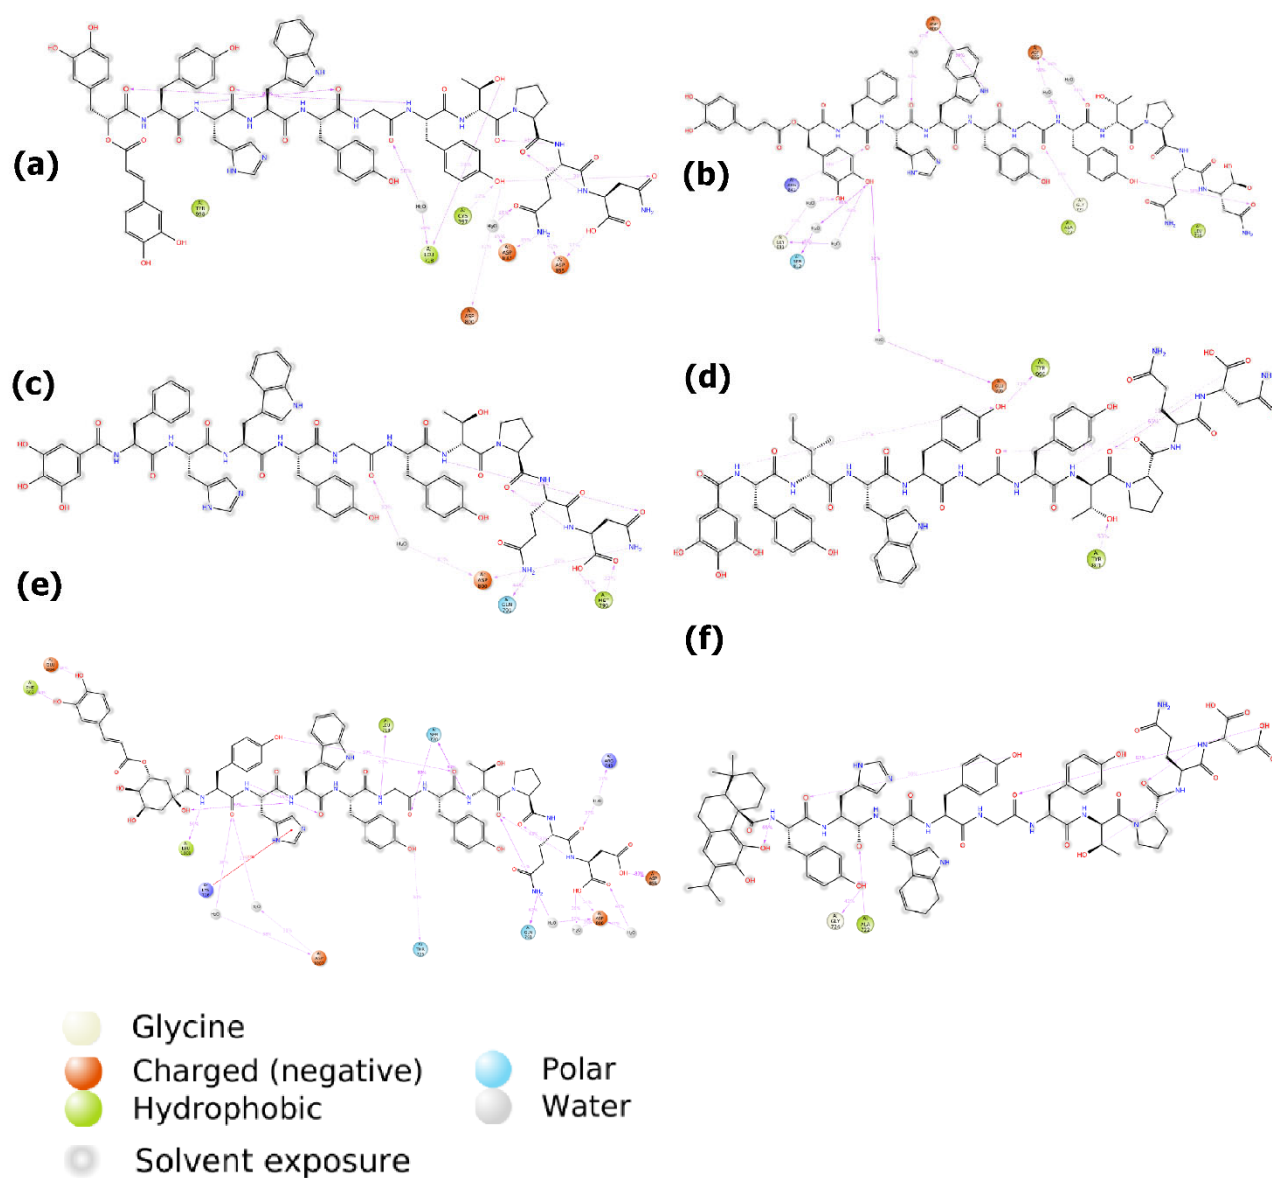

**Figure S13.** Schematic of ligand atom interactions with the EGFR receptor protein residues. Interactions that occur more than **30.0%** of the simulation time are shown. (a) with RMA-Pep; (b) with RMA-Mut1 conjugate (c) with GLA-Mut1 conjugate; (d) with GLA-Mut2 conjugate; (e) with CGA-Mut4 conjugate; (f) with CSA-Mut4 conjugate
